1 **Bcl-x<sub>L</sub> restricts transcriptional, morphological and functional decompensation of β-**  
2 **cell mitochondria under chronic glucose excess**

3

4 Daniel J. Pasula<sup>1,\*</sup>, Rocky Shi<sup>1,\*</sup>, Ben Vanderkruk<sup>1</sup>, Alexis Z.L. Shih<sup>1,3</sup>, Yuanjie Zou<sup>1</sup>, Ahsen  
5 Chaudhry<sup>1</sup>, Brad G. Hoffman<sup>1,2</sup> and Dan S. Luciani<sup>1,2</sup>

6

7 <sup>1</sup>*BC Children's Hospital Research Institute, Vancouver, BC, Canada*

8 <sup>2</sup>*Department of Surgery, University of British Columbia, Vancouver, BC, Canada*

9 <sup>3</sup>*Max Delbrück Center for Molecular Medicine, Berlin, Germany*

10

11 \*These authors contributed equally

12

13 **Running Title:** Preservation of β-cell mitochondrial homeostasis by Bcl-x<sub>L</sub>

14

15 **Corresponding Author:**

16 Dan S. Luciani, PhD

17 University of British Columbia

18 BC Children's Hospital Research Institute

19 A4-183, 950 W. 28<sup>th</sup> Avenue

20 Vancouver, BC, V5Z 4H4, Canada

21 Phone: (+1) 604-875-2000 ext. 6170

22 Fax: (+1) 604-875-2373

23 Email: [dluciani@bcchr.ca](mailto:dluciani@bcchr.ca)

24

25 **Abbreviations:**  $\Delta\Psi_m$ , mitochondrial membrane potential; DZ, diazoxide; ER, Endoplasmic  
26 Reticulum; ERAD, ER-associated degradation; ETC, Electron Transport Chain; FCCP, carbonyl  
27 cyanide 4-(trifluoromethoxy) phenylhydrazone; GO, Gene Ontology; HG, high glucose; KRB,  
28 Krebs's Ringer's Buffer; mitoROS, mitochondrial ROS; MT, MitoTempo; mtDNA, mitochondrial  
29 DNA; MTG, MitoTracker Green; NG, normal glucose; OCR, oxygen consumption rate;  
30 OXPHOS, oxidative phosphorylation; T2D, type 2 diabetes; TM, tamoxifen; TMRE,  
31 tetramethylrhodamine, ethyl ester; UPR, unfolded protein response.

32 **ABSTRACT**

33 In the progression of diabetes, pancreatic islet  $\beta$ -cells respond to increased metabolic demand with  
34 functional compensation, followed by pathogenic decompensation of mitochondria-dependent  
35 insulin secretion. It is not clear what mechanisms drive, or control, mitochondrial decompensation.  
36 Here, we report that anti-apoptotic Bcl-x<sub>L</sub> maintains mitochondrial integrity in  $\beta$ -cells under non-  
37 apoptotic levels of glucose stress. Prolonged glucose excess causes transcriptional reprogramming  
38 of glycolysis and  $\beta$ -cell identity genes, while sensitizing glucose-stimulated Ca<sup>2+</sup> signaling and  
39 insulin secretion. Deletion of Bcl-x<sub>L</sub> amplifies this insulin hypersecretion and increases  
40 mitochondrial fusion, mitochondrial volume, and oxygen consumption, whereas ATP-coupled  
41 respiration and mitochondrial hyperpolarization become impaired. Of note, Bcl-x<sub>L</sub>-deficient  $\beta$ -  
42 cells have impaired Pgc-1 $\alpha$  expression, and develop specific defects in the expression of *Tfam*,  
43 mitochondrial ribosomal genes, and OXPHOS components under glucose stress. Bcl-x<sub>L</sub> limits high  
44 glucose-induced mitochondrial ROS (mitoROS) levels and pharmacological normalization of  
45 mitoROS in Bcl-x<sub>L</sub> KO cells rescues glucose-induced defects in mitochondrial gene expression  
46 and changes to  $\beta$ -cell identity. Our data identify mitoROS as a primary retrograde driver of  
47 transcriptional re-wiring in  $\beta$ -cells exposed to excess glucose, and reveal Bcl-x<sub>L</sub> as an important  
48 safeguard against transcriptional and functional decompensation of  $\beta$ -cell mitochondria. Bcl-x<sub>L</sub>  
49 and mitoROS may thus be viable targets to prevent early  $\beta$ -cell dysfunction and the progression of  
50 diabetes.

## 51 INTRODUCTION

52 Nutrient-induced  $\beta$ -cell insulin secretion is essential to maintain normoglycemia, and  $\beta$ -cell failure  
53 is a defining event in the development of type 2 diabetes (T2D). In response to worsening insulin  
54 resistance and nutrient excess  $\beta$ -cells respond by increasing their total insulin output, which may  
55 compensate sufficiently to maintain euglycemia and prevent the progression toward prediabetes  
56 and diabetes. Evidence suggests that  $\beta$ -cell compensation involves both an initial augmentation of  
57 cellular function<sup>1,2</sup>, and a slower expansion of total  $\beta$ -cell mass<sup>2</sup>. However, in individuals that  
58 progress to develop diabetes, the compensatory response is transient due to a progressive  
59 development of  $\beta$ -cell dysfunction, and ultimately also a loss of  $\beta$ -cells by dedifferentiation, trans-  
60 differentiation and apoptosis.

61  $\beta$ -Cell mitochondrial metabolism generates ATP and other metabolic coupling factors that are  
62 essential for glucose-stimulated insulin secretion<sup>3</sup>. Severe disruptions to both mitochondrial  
63 function and structure are seen in  $\beta$ -cells from mice and humans with T2D, indicating that  
64 mitochondrial dysfunction plays a role in the failure of nutrient-induced insulin secretion<sup>4-6</sup>. Recent  
65 findings have shown that relatively modest increases in blood glucose are associated with changes  
66 in the expression of genes related to  $\beta$ -cell identity and metabolism<sup>7</sup>, and that the progression of  
67 diabetes and hyperglycemia is associated with increasing disruption of transcripts and proteins  
68 involved in oxidative phosphorylation and other aspects of mitochondrial physiology<sup>8</sup>.  
69 Comparatively little is known about the mechanisms that mediate the earlier stages of functional  
70 adaptation, but augmented mitochondrial metabolism likely plays a central role<sup>9</sup>. Therefore,  
71 glucose-induced changes to  $\beta$ -cell mitochondrial function appear central to the development of  
72 T2D. Despite these recent insights, it remains unclear what mechanisms drive the progression from  
73 mitochondrial adaptation to failure under conditions of chronic glucose excess.

74 Apoptosis-regulating proteins in the Bcl-2 family have emerged as important regulators of  
75 physiological processes in non-transformed cells, including notable roles of both pro- and anti-  
76 apoptotic proteins in the regulation of cellular metabolism<sup>10</sup>. We, and others, have linked Bcl-2  
77 family proteins to glucose-stimulated mitochondrial function and insulin secretion in pancreatic  $\beta$ -  
78 cells<sup>11-14</sup>. Our previous work demonstrated that anti-apoptotic Bcl-xL dampens the responsiveness  
79 of  $\beta$ -cell mitochondria to glucose stimulation<sup>12</sup>, and we hypothesized that these non-canonical  
80 metabolic functions could play an important role in maintaining mitochondrial integrity in  $\beta$ -cells  
81 during increases in metabolic demand.

82 In this paper, we tested this possibility by examining the relationship between  $\beta$ -cell gene  
83 expression, function, and mitochondrial homeostasis in Bcl-xL wild-type and knockout  $\beta$ -cells  
84 exposed to chronic high levels of glucose. Our results reveal a previously unrecognized role of  
85 Bcl-xL in limiting the progression of mitochondrial decompensation in  $\beta$ -cells under non-apoptotic  
86 levels of metabolic stress.

87

## 88 **METHODS**

### 89 ***Reagents***

90 Tamoxifen (#T5648), Collagenase type XI (#C7657), Tetramethylrhodamine Ethyl Ester (TMRE,  
91 #87917), D-glucose (#G7528), Diazoxide (DM, #D9035), MitoTEMPO (#SML0737), FCCP  
92 (#C2920), Oligomycin (#O4876), Antimycin-A (#A8674) and Rotenone (#R8875) were  
93 purchased from Sigma-Aldrich (St. Louis, MO). Fura-2 AM (#F1221), MitoTracker Green FM  
94 (MTG, #M7514), Hoechst 33342 (#H3570), MitoSOX (#M36008), RPMI 1640 (#11879),  
95 Dulbecco's Modified Eagle's Medium (DMEM, #11995), Fetal Bovine Serum (FBS, #10438),  
96 Trypsin-EDTA (#25300), Penicillin-Streptomycin 10,000 U/ml (#15140), and HBSS (#14185)

97 were from Life Technologies/Thermo Fisher Scientific (Carlsbad, CA). Dimethyl sulfoxide  
98 (DMSO, #BP231) was purchased from Fisher Scientific (Waltham, MA) and Minimum Essential  
99 Media (MEM, #15-015-CV) was from Corning (Corning, NY). Seahorse XF<sup>e</sup>24 Islet Capture  
100 FluxPak (103518-100) were purchased from Agilent Technologies Canada (Mississauga, ON).

101

## 102 *Animals*

103 Mice with tamoxifen (TM)-inducible  $\beta$ -cell-selective deletion of Bcl-x<sub>L</sub> were established and bred  
104 as previously described<sup>12</sup>. Pdx1-CreER<sup>TM</sup>:Bclx<sup>fl/fl</sup> mice were injected 4 consecutive days with 3  
105 mg/40g TM injection to induce gene deletion and generate Bcl-x<sub>L</sub> knockout (Bclx $\beta$ KO) mice. TM-  
106 injected littermate Bclx<sup>fl/fl</sup> (Bclx $\beta$ WT) mice were used as controls to account for possible metabolic  
107 effects of tamoxifen<sup>15,16</sup>. To avoid potential long-term compensation for Bcl-x<sub>L</sub> deletion, islets  
108 were isolated 5-7 days after the last TM injection. Experiments were done using 14-16 week old  
109 male mice. All animal procedures were done according to national and international guidelines  
110 and approved by the University of British Columbia Animal Care Committee.

111

## 112 *Islet Isolation and Cell Culture*

113 Pancreatic islets were isolated by our previously described methods of collagenase digestion and  
114 filtration-based purification<sup>11</sup>. The isolated islets were hand-picked and allowed to rest overnight  
115 before further analysis or experimental cultures. Aliquots of islets from all experimental mice were  
116 collected for qPCR confirmation of tamoxifen-induced gene deletion. For single cell microscopy  
117 the islets were dispersed and seeded on 25 mm glass coverslips<sup>17</sup>. The effects of nutrient excess  
118 were examined by culturing intact islets or dispersed islet-cells for 6 days in RPMI completed with

119 10% FBS and 2% Penicillin-Streptomycin and containing either 11 mM glucose (normal glucose;  
120 NG) or 25 mM glucose (high glucose; HG).

121

### 122 ***Respiratory Control Analysis***

123 Islet respiration was quantified using the Seahorse XF<sup>c</sup>24 Analyzer (Agilent Technologies). Intact  
124 islets were washed with PBS twice and loaded into XF<sup>c</sup>24 islet capture microplates in Seahorse  
125 XF RPMI Medium pH 7.4 (#103576) supplemented with 3 mM glucose, 2 mM Glutamine and 2  
126 mM Sodium Pyruvate and incubated at 37°C in a non-CO<sub>2</sub> incubator for 60 min before loading  
127 into the XF<sup>c</sup>24 Analyzer. After the basal oxygen consumption rate (OCR) measurement reached a  
128 steady state, the wells were injected with either – 1) increasing concentrations of glucose followed  
129 by 1 μM oligomycin; or 2) exposed to a mitochondrial stress test, consisting of the sequential  
130 injection of 15 mM glucose, 1 μM oligomycin, 2 μM FCCP and finally a combination of 1 μM  
131 rotenone and 1 μM antimycin A. The amount of ATP-coupled respiration, ATP coupling  
132 efficiency, proton leak and spare respiratory capacity were calculated as described in<sup>18</sup>. OCR  
133 values were normalized to total DNA per well quantified on Qubit<sup>TM</sup> Fluorometer (Q32857  
134 Invitrogen) using Qubit<sup>TM</sup> dsDNA HS Assay Kit (Q32854).

135

### 136 ***Ca<sup>2+</sup> Imaging***

137 Intact islets were pre-cultured 2-6 days on glass coverslips in RPMI containing glucose  
138 concentrations as indicated. Cytosolic Ca<sup>2+</sup> signaling was then measured using Fura-2AM  
139 fluorescence microscopy, essentially as previously<sup>11</sup>. Briefly, islets were loaded with 5 μM Fura-  
140 2 for 30 min in RPMI containing 3 mM glucose and transferred to a 2 ml imaging chamber for  
141 continuous perfusion at 2.5 ml/min with Ringer's solution containing 5.5 mM KCl, 2 mM CaCl<sub>2</sub>,

142 1 mM MgCl<sub>2</sub>, 20 mM HEPES, and 144 mM NaCl and varying glucose concentrations. Before  
143 image acquisition, the perfused islets were equilibrated for 30 min with 3 mM glucose Ringer's  
144 and Ca<sup>2+</sup> changes then recorded in response to glucose and other stimuli, as indicated. Cytosolic  
145 Ca<sup>2+</sup> levels are expressed as the Fura-2 fluorescence intensity ratio (F<sub>340</sub>/F<sub>380</sub>).

146

### 147 ***Confocal Imaging and Analysis of Mitochondria***

148 Live islet-cells were imaged in a Tokai Hit INUBTFP-WSKM stage-top incubator at 37°C and 5%  
149 CO<sub>2</sub> on a Leica SP8 Laser Scanning Confocal Microscope (Concord, Ontario, Canada). Optimized  
150 2D and 3D confocal image acquisition, as well as quantitative extraction of mitochondrial features,  
151 was done according to our recent pipeline for mitochondrial analysis<sup>19</sup>. For automated batch  
152 analysis we used the associated Mitochondria Analyzer plugin that we developed for the  
153 ImageJ/Fiji and have made available online<sup>20,21</sup>.

154

### 155 ***Machine Learning-based Classification of Mitochondrial Morphology and Networking***

156 For machine learning-based classification of 3D mitochondrial features we first generated a  
157 training set based on image stacks of MTG-labelled mouse islet-cells and MIN6 cells expressing  
158 mitochondria-targeted YFP. From these images, morphological and networking descriptors were  
159 quantified for a total of 2190 mitochondria and the data was grouped into 7 clusters by  
160 unsupervised K-means cluster analysis in the XLSTAT software (Addinsoft, NY). The clusters  
161 were visually examined and merged based on similarity until 4 major groupings remained, which  
162 we classified as Punctate, Tubular, Filamentous, and Highly Complex based on their visual  
163 characteristics. The principal features of each morphological classification are summarized in  
164 Table 1. All 2190 mitochondria were then manually inspected to verify their correct classification

165 and reassignments were made as necessary. The final training set was then produced by re-  
166 quantifying the morphological and networking descriptors of all mitochondria within each of the  
167 classifications.

168

169 **Table 1: Description of features that characterize mitochondrial morphological classifications.**

| Classification    | Features                                                                                                                                                                  |
|-------------------|---------------------------------------------------------------------------------------------------------------------------------------------------------------------------|
| Punctate          | Spheroid, small mitochondria with little to no branch length or complexity.                                                                                               |
| Tubular           | Long or elongated mitochondria with variable branch length, but only 1 or few branches.                                                                                   |
| Filamentous       | Networked mitochondria with multiple branches.                                                                                                                            |
| Highly<br>Complex | Extremely connected mitochondria with very high branch descriptor values. Typically $\geq 8\mu\text{m}^3$ volume or containing >10% of cell's total mitochondrial volume. |

170

171 After establishing the training set, it was used to classify mitochondria of experimental cells using  
172 a Random Forest Classification algorithm in XLSTAT. The mitochondrial profile of a cell was  
173 then established as the proportion of each mitochondrial "morpho-types" normalized to the total  
174 mitochondrial volume in the cell. A summary of the workflow is shown in Supplemental Fig. 1.

175

### 176 ***Mitochondrial ROS Imaging***

177 Dispersed islet cells were pre-cultured for 6 days on glass coverslips in either NG or HG RPMI  
178 with or without addition of 500 nM of the mitochondria-targeted superoxide scavenger  
179 MitoTEMPO. Mitochondrial ROS was then measured using MitoSOX Red superoxide indicator.  
180 Briefly, cells were washed and then stained with 5  $\mu\text{M}$  MitoSOX in phenol red free RPMI  
181 protected from light and incubated at 37°C and 5% CO<sub>2</sub> for 15 minutes before being imaged using  
182 a Leica DMI6000 inverted microscope equipped with an HCX Plan FLUOTAR L 20x objective,  
183 a DFC365FX digital camera, 546/12x excitation and 605/75m emission filters.



## 184 ***Islet Insulin Secretion and Insulin Content***

185 Insulin secretion was measured under static incubations from 15 size-matched islets. Following 6-  
186 day pre-culture, the islets were collected in 1.5 ml low retention microcentrifuge tubes and  
187 equilibrated for 1 hour in Kreb's Ringer's buffer (KRB; 129 mM NaCl, 4.8 mM KCl, 1.2 mM  
188 MgSO<sub>4</sub>, 1.2 mM KH<sub>2</sub>PO<sub>4</sub>, 2.5 mM CaCl<sub>2</sub>, 5 mM NaHCO<sub>3</sub>, 10 mM HEPES and 0.5% BSA) with  
189 3 mM glucose. The same groups of islets were then transferred between tubes containing 500 µl  
190 of KRB with glucose and treatments as indicated, moving sequentially from low to high glucose  
191 conditions. After each 60 min incubation step the islets were spun down at 4°C, supernatant was  
192 collected for measurement of secreted insulin, and the islets were re-counted before transfer to the  
193 next tube. Islet insulin content was extracted by washing twice with chilled PBS and freeze-  
194 thawing in 100 µl of RIPA buffer at -20°C before assay. Insulin concentrations were measured  
195 using the Ultrasensitive Insulin ELISA kit (Alpco #80-INSMSU-E10) according to manufacturer's  
196 manual. Luminescence was measured at 450 nm on a SpectraMaxL luminometer (Molecular  
197 Devices)

198

## 199 ***RT-qPCR***

200 For each sample, 40 to 50 islets were preserved in 40 µl RNAlater (Qiagen #76104) at -80°C before  
201 RNA isolation. Total RNA was isolated using the RNEasy Mini Kit (Qiagen #74106) and  
202 measured by NanoDrop™ 2000 (Thermo Fisher, Carlsbad, California). Freshly isolated RNA (100  
203 ng/sample) was reverse transcribed using qScript cDNA synthesis kit (Quanta Bioscience #95047-500)  
204 and cDNA was stored at -20°C until use. The qPCR reactions were run using: 4 µl PerfeCTa SYBR  
205 green Fastmix (Quanta Biosciences #95072), 5 µM forward and reverse mixed primers, 1 µl  
206 cDNA, and 1.5 µl ddH<sub>2</sub>O. Primer efficiencies were validated by serial dilutions and amplicon size  
207 confirmed by agarose gel electrophoresis. Validated primer sequences are listed in Table 2.

208 Expression levels were assayed in triplicates on 384-well microplates (Life technologies  
 209 #4309849) on a ViiA7 Real-Time PCR machine (Applied Biosystems, Foster City, California) and  
 210 normalized to the *Actb* housekeeping gene.

211

212 **Table 2: qPCR primers used**

| <i>Gene Target</i>                | <i>Forward Primer (5' to 3')</i> | <i>Reverse Primer (5' to 3')</i> |
|-----------------------------------|----------------------------------|----------------------------------|
| <i>Actb</i>                       | <i>GATCTGGCACCACACCTTCT</i>      | <i>GGGGTGTGGAAGGTCTCAA</i>       |
| <i>Bcl2l1 (Bcl-x<sub>l</sub>)</i> | <i>GACAAGGAGATGCAGGTATTGG</i>    | <i>TCCCGTAGAGATCCACAAAAGT</i>    |
| <i>Ucp2</i>                       | <i>CAGCCAGCGCCCAGTACC</i>        | <i>CAATGCGGACGGAGGCCAAAGC</i>    |
| <i>Hmox1</i>                      | <i>CAGAAGGGTCAGGTGTCCA</i>       | <i>CTCCAGGGCCGTGTAGAT</i>        |
| <i>Pdk1</i>                       | <i>GGCGGCTTTGTGATTTGTAT</i>      | <i>GTCCTGGTGATTTTCGCATTT</i>     |
| <i>Mafa</i>                       | <i>TTCAGCAAGGAGGAGGTCAT</i>      | <i>TTCTCGCTCTCCAGAATGTG</i>      |
| <i>Ddit3 (Chop)</i>               | <i>CTGCCTTTCACCTTGGAGAC</i>      | <i>CGTTTCCTGGGGATGAGATA</i>      |
| <i>Hspa5 (Bip)</i>                | <i>TCATCGGACGCACTTGGAA</i>       | <i>CAACCACCTTGAATGGCAAGA</i>     |
| <i>Xbp1-t</i>                     | <i>TGGCCGGGTCTGCTGAGTCCG</i>     | <i>GTCCATGGGAAGATGTTCTGG</i>     |
| <i>Xbp1-s</i>                     | <i>GAGTCCGCAGCAGGTG</i>          | <i>GTGTCAGAGTCCATGGGA</i>        |
| <i>Ins2</i>                       | <i>GAAGTGGAGGACCCACAAGTG</i>     | <i>GATCTACAATGCCACGCTTCT</i>     |
| <i>Ldha</i>                       | <i>AGGCTCCCCAGAACAAGATT</i>      | <i>TCTCGCCCTTGAGTTTGTCT</i>      |
| <i>Gck</i>                        | <i>AGCTGCACCCGAGCTTCA</i>        | <i>GATTTTCGCAGTTGGGTGTCA</i>     |
| <i>Bcl2</i>                       | <i>ACTTCGCAGAGATGTCCAGTCA</i>    | <i>TGGCAAAGCGTCCCCTC</i>         |
| <i>Trib3</i>                      | <i>TGCAGGAAGAAACCGTTGGAG</i>     | <i>CTCGTTTTAGGACTGGACACTTG</i>   |
| <i>Txnip</i>                      | <i>GCTTTGACTCGGGTAACTTCACA</i>   | <i>TCTTTTGAGGTGGTCTTCAACG</i>    |
| <i>Ndufb8</i>                     | <i>TGTTGCCGGGGTCATATCCTA</i>     | <i>AGCATCGGGTAGTCGCCATA</i>      |
| <i>Sdhb</i>                       | <i>AATTTGCCATTTACCGATGGGA</i>    | <i>AGCATCCAACACCATAGGTCC</i>     |

|                          |                                |                               |
|--------------------------|--------------------------------|-------------------------------|
| <i>Cox4l1</i>            | <i>ATTGGCAAGAGAGCCATTTCTAC</i> | <i>CACGCCGATCAGCGTAAGT</i>    |
| <i>Atp5e</i>             | <i>CAGGCTGGACTCAGCTACATC</i>   | <i>GTTCGCTTTGAACTCGGTCTT</i>  |
| <i>Tfam</i>              | <i>GATGGCGCTGTTCCGG</i>        | <i>TGGATAGCTACCCATGCTGGA</i>  |
| <i>Mfn1</i>              | <i>TCTCCAAGCCCAACATCTTCA</i>   | <i>ACTCCGGCTCCGAAGCA</i>      |
| <i>Mfn2</i>              | <i>ACGTCAAAGGGTACCTGTCCA</i>   | <i>CAATCCCAGATGGCAGAACTT</i>  |
| <i>Opa1</i>              | <i>AAGTGGATTGTGCCTGACTTT</i>   | <i>CAACCCGTGGTAGGTGATCT</i>   |
| <i>Drp1</i>              | <i>GCGCTGATCCCGCGTCAT</i>      | <i>CCGCACCCACTGTGTTGA</i>     |
| <i>Fis1</i>              | <i>GCCCCTGCTACTGGACCAT</i>     | <i>CCCTGAAAGCCTCACACTAAGG</i> |
| <i>Ppargc1a (Pgc-1α)</i> | <i>CAAACCCTGCCATTGTTAAG</i>    | <i>TGACAAATGCTCTTCGCTTT</i>   |

213

## 214 **RNA-Sequencing**

215 *Sample preparation and sequencing* - RNA was extracted from whole pancreatic islets using Trizol  
216 Reagent (Life Technologies, 15596026) and ethanol precipitation with glycogen as a carrier,  
217 followed by DNase-treatment using Turbo DNA Free Kit (Life Technologies, AM1907). Total  
218 RNA content was estimated using Nanodrop, and samples were prepared for sequencing from 400  
219 ng of total RNA using NEBNext Ultra II Directional RNA Library Kit for Illumina with poly(A)  
220 mRNA enrichment (NEB, E7760, E7490) according to the manufacturer's protocols. Libraries  
221 were quantified using Qubit fluorometer and Agilent Bioanalyzer, pooled, and sequenced on an  
222 Illumina NextSeq 500 (paired-end, 38 base-pair reads) to a depth of approximately 30 million  
223 reads per sample.

224 *Data alignment* - Quality of the sequenced RNA-Seq libraries was assessed using FastQC v0.11.2  
225 (Babraham Bioinformatics). Read quality filtering and adapter trimming were carried out using  
226 Trimmomatic v0.39<sup>22</sup>. The resulting reads were then aligned and quantified at the transcript level

227 using Salmon<sup>23</sup> against GENCODE M20/GRCm38.p6 with the default parameters, and aggregated  
228 to the gene level using tximport<sup>24</sup>.

229 *Differential gene expression analysis and quantification* - Gene expression values measured as  
230 relative counts were generated using DESeq2 v1.24.0<sup>25</sup>, and a minimum threshold of 10 gene  
231 counts across all samples was imposed. Differentially-expressed genes were identified in pair-wise  
232 comparisons of the four biological conditions (WT\_NG; WT\_HG; KO\_NG; KO\_HG) using  
233 DESeq2, implementing the *apeglm* method<sup>26</sup> for effect-size estimation. Genes with fold-change  $\geq$   
234 1.5 and  $p_{\text{adj}} \leq 0.05$  were considered significantly down- or up-regulated. Data visualizations were  
235 generated using custom R scripts.

236 *Gene-ontology analysis* - Biological pathway and function analyses were performed using The  
237 Database for Annotation, Visualization and Integrated Discovery (DAVID v6.8) with default  
238 parameter settings<sup>27,28</sup>.

239

#### 240 ***Statistical Analysis***

241 All data were represented as mean  $\pm$  standard error of the mean (SEM). Data were analyzed in  
242 GraphPad Prism 9.0 (La Jolla, California) using Student's t-test, one-way ANOVA, or two-way  
243 ANOVA followed by multiple comparison tests, as appropriate. Statistical significance was set at  
244 a threshold of  $p < 0.05$ .

245

246

247

248

249

## 250 RESULTS

### 251 *Islet transcriptional adaptation during prolonged high glucose exposure*

252 To examine the effects of sustained metabolic demand, we used a controlled *in vitro* model  
253 consisting of 6-day islet culture in normal glucose media (11 mM glucose; NG) or high glucose  
254 media (25 mM glucose; HG) (Fig. 1a). For a broad overview of high glucose-induced changes to  
255 islet gene expression, we performed bulk RNA-Seq analysis of NG- and HG-cultured Bclx $\beta$ WT  
256 and Bclx $\beta$ KO islets. High glucose caused major changes to the transcriptional profiles; in  
257 Bclx $\beta$ WT islets the expression of 1708 genes (654 down and 1054 up) were altered, and in  
258 Bclx $\beta$ KO islets 2182 genes (1013 down and 1169 up) were differentially expressed after HG  
259 culture. Of these HG-sensitive transcripts, 725 were altered in both genotypes (Fig. 1b). Focusing  
260 first on the common, genotype-independent, response to excess glucose, we performed pathway  
261 enrichment analysis, which revealed that the shared transcripts were dominated by changes related  
262 to protein and amino acid processing, as well as cellular metabolism (Fig. 1b). Notably, the  
263 strongest enrichment was associated with protein processing in the endoplasmic reticulum (ER).  
264 Glucose-stimulated insulin biosynthesis increases pressure on the ER protein processing and  
265 folding machinery, which can lead to ER stress and apoptosis if the system is overwhelmed. To  
266 evaluate islet ER stress status, we compared the shared transcripts to those associated with the  
267 gene ontology term “Response to ER stress” (GO:0034976). Of the 725 transcripts, 32 fell in this  
268 category and together they indicated a robust up-regulation related to adaptive ER protein  
269 homeostasis, including ER-associated degradation (ERAD), protein translation and folding (Fig.  
270 1c). *Itpr1*, which encodes isoform 1 of the IP<sub>3</sub>R ER Ca<sup>2+</sup> release channel was down-regulated in  
271 HG culture. We previously demonstrated that IP<sub>3</sub>R activity can exacerbate  $\beta$ -cell ER stress and  
272 apoptosis<sup>29</sup>, suggesting that *Itpr1* down-regulation is a protective ER response. The pro-apoptotic

273 gene *Trib3* was induced in both Bclx $\beta$ WT and Bclx $\beta$ KO islets and HG culture also caused some  
274 genotype-specific changes to ER stress genes, but neither genotype showed other defining  
275 characteristics of the transition toward ER stress-induced  $\beta$ -cell apoptosis, such as loss of the  
276 adaptive unfolded protein response (UPR) or significant induction of *Ddit3* (aka *Chop*)<sup>30</sup> (Fig. 1e  
277 & Supplemental Fig. 2).

278  $\beta$ -Cell glucotoxicity is also mediated by oxidative stress, so we also compared common  
279 HG-altered transcripts to the gene ontology term "Oxidative Stress Response" (GO: 0006979). In  
280 combination with qPCR, this identified some ROS-associated changes to islet mRNA expression;  
281 *Hmox1* and *Txnip* were up-regulated but other major redox-regulated transcripts, including *Gpx1*,  
282 *Cat*, *Sod1*, *Sod2* and *Nfe2l2* were not significantly affected (Fig. 1d,f and not shown). This  
283 indicates some activation of oxidative stress, but not sufficiently severe to induce large-scale  
284 changes to the expression of antioxidant response genes.

285 Further suggesting that the high glucose challenge was not overtly toxic, the RNA-Seq  
286 analysis did not show a pro-apoptotic shift in Bcl-2 family transcripts<sup>31</sup>. Major family members  
287 were unaltered by HG in Bclx $\beta$ WT islets, whereas Bclx $\beta$ KO islets only showed an increase in  
288 anti-apoptotic *Bcl2l2* (aka *Bclw*;  $p_{\text{adj}} < 0.01$ , NG vs HG). Moreover, no significant islet cell death  
289 was detected in response to the 6-day high glucose culture, even in the absence of Bcl-xL (Fig. 1g).  
290 Using a more toxic challenge with high concentrations of ribose<sup>32-34</sup>, we established that deletion  
291 of Bcl-xL did in fact sensitize  $\beta$ -cells to oxidative stress-related death (Fig. 1h), consistent with its  
292 canonical function in restricting Bax- and Bak-mediated apoptosis<sup>35</sup>.

293 Overall, this shows that in our model of prolonged glucose excess, the common  
294 transcriptional changes in Bclx $\beta$ WT and Bclx $\beta$ KO islets include signs of beginning oxidative  
295 stress, but, as a whole, are non-apoptotic and dominated by robust activation of the adaptive UPR.

296 ***Effects of high glucose culture on the expression of glycolytic and  $\beta$ -cell identity genes***

297 In addition to ER protein processing, both Bclx $\beta$ WT and Bclx $\beta$ KO islets responded to HG with  
298 altered expression of metabolic genes (Fig. 1). The common changes included up-regulation of a  
299 number of transcripts in glycolysis (Fig. 2a). Notably, there was also a significant loss of glucose  
300 transporter 2 (*Slc2a2*) and glucokinase (*Gck*) expression, as well as up-regulation of *Ldha* and  
301 *Pdk1* (Figs. 2a,b). *Ldha* is one of several ‘disallowed’ genes, the repression of which distinguishes  
302 mature  $\beta$ -cells and it helps maintain optimal capacity for glucose-stimulated OXPHOS and insulin  
303 secretion<sup>36</sup>. The increase in *Ldha* expression was not accompanied by significant up-regulation of  
304 other core  $\beta$ -cell disallowed genes<sup>37</sup> (Supplemental Fig. 3), but together these transcriptional  
305 changes indicate a metabolic reprogramming with increased partitioning of glucose-derived  
306 pyruvate away from mitochondria toward lactate (Fig. 2c). Of note, the HG-induced upregulation  
307 of glycolysis-related genes included *Aldh1a3*, which is a feature of dedifferentiated and  
308 metabolically deficient  $\beta$ -cells<sup>38</sup>. Closer inspection further showed higher expression of the  $\alpha$ -cell-  
309 restricted gene *Gc*<sup>39</sup>, and reduced levels of key  $\beta$ -cell markers *Ins2*, *Ucn3*, *Mafa*, *Nkx6-1*, *Slc2a2*  
310 (*Glut2*), *Glpr1*, and *Slc30a8*, all of which indicates a beginning loss of mature  $\beta$ -cell identity (Figs.  
311 2d,e). Interestingly, *Pdx1* levels were higher in Bclx $\beta$ KO islets ( $p_{\text{adj}} < 0.001$ , Bclx $\beta$ KO vs  
312 Bclx $\beta$ WT in HG), but overall, the HG-induced transcriptional changes to glycolysis and  $\beta$ -cell  
313 identity were similar between the two genotypes. Together these results show that prolonged high  
314 glucose exposure causes metabolic reprogramming and beginning loss of the mature  $\beta$ -cell  
315 identity, and this happens similarly in Bclx $\beta$ WT and Bclx $\beta$ KO islets.

316

317

318

319 *Effects of excess glucose and Bcl-xL deletion on  $\beta$ -cell  $Ca^{2+}$  signaling and insulin secretion*

320 To determine how Bcl-xL knockout and HG-induced transcriptional changes related to  $\beta$ -cell  
321 function, we first compared acute glucose-stimulated  $Ca^{2+}$  signalling in Bclx $\beta$ WT and Bclx $\beta$ KO  
322 islets. Voltage-gated  $Ca^{2+}$  entry is a prerequisite signal that triggers and shapes the kinetics of  
323 glucose-stimulated insulin secretion<sup>3</sup>. After 2 days in NG culture, Bclx $\beta$ WT islets responded to 15  
324 mM glucose with a mix of  $Ca^{2+}$  oscillations (47%) and plateau rises (53%), which is expected for  
325 a glucose stimulus of intermediate strength. In contrast, all Bclx $\beta$ KO islets responded with plateau  
326 steady-state  $Ca^{2+}$  elevations (Fig 3a), which is normally seen at higher, saturating, glucose  
327 concentrations. After 2 days of HG culture, islets of both genotypes had modest elevations in  
328 baseline  $Ca^{2+}$  and a beginning delay in their return to basal after removal of the stimulus (Figs. 3a).  
329 Additionally, HG-cultured Bclx $\beta$ WT islets no longer oscillated and only showed  $Ca^{2+}$  plateaus  
330 similar to Bclx $\beta$ KO islets (Fig. 3a). Extending the HG culture to 6 days did not affect the plateau  
331 or peak  $Ca^{2+}$  levels in either genotype (Figs. 3b,c). However, the elevation in basal  $Ca^{2+}$  and the  
332 delay in recovering to baseline were worsened, and these disruptions to islet  $Ca^{2+}$  kinetics were  
333 exacerbated in the absence of Bcl-xL (Figs. 3b,c).  $Ca^{2+}$  on- and off-rates in response to  
334 depolarization with KCl were not affected, so the inability to rapidly terminate glucose-induced  
335  $Ca^{2+}$  signaling was not due to impaired extrusion and buffering mechanisms (Fig. 3d).

336 A transition from oscillatory to plateau  $Ca^{2+}$  responses at intermediate glucose levels may  
337 occur if islets are sensitized to the sugar. We therefore tested the responsiveness of NG- and HG-  
338 cultured islets by comparing cytosolic  $Ca^{2+}$  during a step-wise glucose ramp, exemplified in Fig.  
339 3e. As quantified in Fig. 3f, HG pre-culture left-shifted the glucose-response profiles of Bclx $\beta$ WT  
340 and Bclx $\beta$ KO islets to a similar degree. Importantly, HG-cultured islets also showed amplified  
341 insulin secretion across the same range of glucose concentrations (Fig. 3g). Although the two



342 genotypes had similarly sensitized  $\text{Ca}^{2+}$  responses,  $\text{Bclx}\beta\text{KO}$  islets secreted significantly more  
343 insulin than  $\text{Bclx}\beta\text{WT}$  islets after both NG and HG culture. Islet insulin content was measured  
344 after the secretion assay and did not differ by genotype. The contents were decreased in HG  
345 cultured islets, but this was accounted for by the amplified insulin release during the glucose ramp  
346 (Supplemental Fig. 4).

347 Collectively, our data thus far show that islets respond to prolonged glucose excess with  
348 compensatory sensitization of  $\text{Ca}^{2+}$  responses and amplified insulin secretion, despite  
349 transcriptional rewiring of glycolysis and the onset of  $\beta$ -cell dedifferentiation. At this stage, islet  
350  $\text{Ca}^{2+}$  response kinetics are perturbed, and both  $\text{Ca}^{2+}$  dysregulation and insulin hyper-secretion are  
351 exacerbated in the absence of  $\beta$ -cell  $\text{Bcl-xL}$ .

352

353 ***Bcl-xL is needed to preserve mitochondrial transcripts and mitochondrial hyperpolarization in***  
354  ***$\beta$ -cells under high glucose culture***

355 To better understand the specific role of  $\text{Bcl-xL}$  in the  $\beta$ -cell response to chronic glucose excess,  
356 we next focused on the genotype-dependent differences in gene expression. In NG culture, a total  
357 of 52 genes were differentially expressed between  $\text{Bclx}\beta\text{WT}$  and  $\text{Bclx}\beta\text{KO}$  islets. High glucose  
358 exposure caused a substantial divergence of the transcriptional profiles and the number of  
359 differentially expressed genes increased to 234 (Fig. 4a). Only 4 of the differentially expressed  
360 transcripts were common to the two culture conditions, including *Bcl2l1*, which encodes for  $\text{Bcl-xL}$   
361 and *Esr1*, which we believe reflects the expression of the  $\text{CreER}^{\text{TM}}$  transgene in  $\text{Bclx}\beta\text{KO}$  islets.  
362 Functional annotation and enrichment analysis showed that the genotype-dependent differences  
363 following HG culture were dominated by transcripts related to mitochondria (Fig. 4b). In total, 53  
364 genes fell in the top Cell Component GO-term “Mitochondrion” and 50 (94%) of these were down-

365 regulated in Bclx $\beta$ KO islets compared to Bclx $\beta$ WT. Notably, a large number of these genes encode  
366 for subunits of electron transport chain (ETC) complexes I through IV, as well as subunits of the  
367 ATP Synthase (Complex V) and mitochondrial ribosomal proteins (Fig. 4c). We confirmed the  
368 striking culture- and genotype-dependent differences in key OXPHOS transcripts by qPCR (Fig.  
369 4d).

370 We next compared mitochondrial function by measuring glucose-stimulated OCR and  
371 mitochondrial membrane potential ( $\Delta\Psi_m$ ). Pre-culture in high glucose significantly amplified total  
372 OCR (OCR<sub>tot</sub>) in islets from both genotypes across a range of glucose stimuli. Under all conditions,  
373 Bclx $\beta$ KO islets consumed significantly more oxygen than Bclx $\beta$ WT islets (Fig. 4e). In agreement  
374 with the increased basal OCR, HG pre-culture also increased the basal  $\Delta\Psi_m$  of dispersed Bclx $\beta$ WT  
375  $\beta$ -cells in 3 mM glucose, but the  $\Delta\Psi_m$  response to acute stimulation by glucose was not amplified  
376 (Fig. 4f). Notably, Bclx $\beta$ KO cells developed a defect in glucose-stimulated  $\Delta\Psi_m$  hyperpolarization  
377 when cultured in HG (Fig. 4f). This suggests Bcl-xL helps  $\beta$ -cells preserve their mitochondrial  
378 proton-motive force when challenged by chronic glucose excess. By comparing OCR in the  
379 presence and absence of the ATP Synthase inhibitor oligomycin, we quantified the amount of  
380 glucose-stimulated oxygen consumption that was coupled to ATP synthesis (OCR<sub>ATP</sub>)<sup>18,40</sup>. Despite  
381 the drastic increase in total OCR, HG culture did not increase OCR<sub>ATP</sub> in either genotype.  
382 Consequently, HG notably reduced the fraction of OCR<sub>tot</sub> that was coupled to ATP production,  
383 particularly in Bclx $\beta$ KO islets (Fig. 4e). This indicates that the impaired  $\Delta\Psi_m$  response in Bcl-xL  
384 KO  $\beta$ -cells is a consequence of respiratory uncoupling.

385

386

387

388 ***Bcl-x<sub>L</sub> is required for normal  $\beta$ -cell expression of *Tfam* and *Pgc-1 $\alpha$****

389 Our RNA-Seq analysis (Fig. 4c) showed an intriguing loss of the mitochondrial transcription factor  
390 *Tfam* specifically in HG-cultured Bclx $\beta$ KO islets. *Tfam* is essential for transcription and  
391 replication of the mitochondrial genome, as well as packaging of mitochondrial DNA (mtDNA)  
392 into nucleoids<sup>41</sup>. In  $\beta$ -cells, *Tfam* is important for mitochondrial function and insulin secretion<sup>42,43</sup>.  
393 We therefore confirmed the Bclx $\beta$ KO-specific loss of *Tfam* by qPCR (Fig. 5a). *Tfam* levels are  
394 transcriptionally regulated by Nrf-1 and its co-regulator Pgc-1 $\alpha$ , which also control the expression  
395 of a large number of nuclear genes involved in mitochondrial biogenesis and function, including  
396 OXPHOS components. We examined *Ppargc1a* expression and found that Pgc-1 $\alpha$  mRNA levels  
397 were increased by HG-culture in Bclx $\beta$ WT islets. In marked contrast, the induction of Pgc-1 $\alpha$   
398 transcript by glucose stress was completely absent in Bclx $\beta$ KO islets and  $\beta$ -cells (Figs. 5a). The  
399 dysregulation of Pgc-1 $\alpha$  and *Tfam* expression in Bclx $\beta$ KO  $\beta$ -cells suggests Bcl-x<sub>L</sub> may also be  
400 important for the control of mitochondrial mass.

401

402 ***Bcl-x<sub>L</sub> limits high glucose-induced perturbations of  $\beta$ -cell mitochondrial dynamics and mass***

403 Mitochondrial function, and their adaptation to metabolic demand, are closely interrelated with the  
404 regulation of mitochondrial network morphology and total mitochondrial mass. Network  
405 connectivity is shaped by the balance of dynamic fusion and fission events<sup>44,45</sup>, while mass is  
406 dictated by the relative amounts of mitochondrial biogenesis versus degradation by  
407 macroautophagy and mitophagy<sup>46,47</sup>. The effects of prolonged glucose excess on  $\beta$ -cell  
408 mitochondrial morphofunction and abundance, however, remain unclear. It is also an important  
409 unanswered question if Bcl-x<sub>L</sub> affects mitochondrial dynamics in  $\beta$ -cells, as reported in neurons<sup>48</sup>.

410 HG culture significantly increased expression of the mitochondrial fusion regulator *Mfn1*  
411 exclusively in Bclx $\beta$ KO islets. The mRNA levels of other fusion-mediators *Mfn2* and *Opal*, as  
412 well as the mitochondrial fission regulators *Drp1* and *Fis1*, were not significantly affected by HG  
413 challenge in either genotype (Fig. 5b and Supplemental Fig. 5). To determine the overall impact  
414 on mitochondrial networking, we used our recent pipeline for confocal analysis of mitochondrial  
415 dynamics and the associated Mitochondria Analyzer software tool<sup>19,20</sup>. For the most accurate  
416 comparisons<sup>19,21</sup>, we generated full 3D reconstructions of the mitochondrial networks and  
417 extracted 9 parameters to quantitatively describe the morphology and structural complexity of each  
418 individual organelle. In parallel, we performed hierarchical clustering of parameters extracted from  
419 independent imaging experiments, which identified 4 primary morphological categories of  $\beta$ -cell  
420 mitochondria; designated as Puncta, Tubular, Filamentous, and Highly Complex (see Table 1 in  
421 Methods for defining features). We then established a training set and performed an unbiased  
422 classification of ~16,000 individual mitochondria from NG- and HG-cultured Bclx $\beta$ WT and  
423 Bclx $\beta$ KO cells into the 4 morphological categories using machine learning algorithms (Fig. 5c and  
424 Methods). By calculating the fraction of each cell's total mitochondrial volume that was mapped  
425 to each category, we found that HG culture significantly increased the population of Highly  
426 Complex mitochondria in Bclx $\beta$ KO cells ( $p < 0.005$ , HG vs NG), but not in Bclx $\beta$ WT cells ( $p = 0.36$ ;  
427 HG vs NG) (Fig. 5d). Combined with the increase in *Mfn1*, this indicates an increase in  
428 mitochondrial fusion, which was substantiated by a larger average organelle volume, quantified  
429 on a per-cell basis (Fig. 5f). Using a parallel coordinates plot we can get an overview of how  
430 mitochondrial parameters vary between genotype and culture conditions (Fig. 5e), and this  
431 highlights that Bclx $\beta$ KO cells respond to high glucose with the most pronounced changes to all  
432 descriptors of mitochondrial morphology and connectivity. Importantly, Bclx $\beta$ KO cells also had

433 a marked increase in total mitochondrial volume that was not seen in Bclx $\beta$ WT cells (Fig. 5f).  
434 Because mitochondrial branch diameter and sphericity were reduced (Fig. 5e), it is unlikely that  
435 the additional volume reflects stress-induced damage and swelling.

436 The observed increase in total mitochondrial volume might explain how HG-cultured  
437 Bclx $\beta$ KO islets remain glucose-responsive and hyper-secrete insulin, despite a significant loss of  
438 mitochondrial transcripts and  $\Delta\Psi_m$ . Our RNA-Seq analyses did not indicate major differences in  
439 TCA cycle components, suggesting the defects might be predominantly ETC-related. If so, an  
440 increase in mitochondrial volume should still enhance the formation of mitochondria-derived  
441 factors for amplification of insulin secretion<sup>49</sup>. Indeed, glucose-dependent amplification of KCl-  
442 stimulated insulin secretion in the presence of diazoxide was significantly augmented in Bclx $\beta$ KO  
443 islets, compared to Bclx $\beta$ WT (Fig. 5g), consistent with a volume-dependent compensation for  
444 ETC-specific defects.

445

446 ***Mitochondrial ROS drives transcriptional reprogramming and Bcl-x<sub>L</sub>-dependent differences in***  
447 ***mitochondrial homeostasis***

448 We previously reported that Bcl-2 has functions in  $\beta$ -cell redox control, and that small molecule  
449 co-inhibitors of Bcl-2 and Bcl-x<sub>L</sub> promote  $\beta$ -cell ROS formation<sup>11</sup>. A specific role of Bcl-x<sub>L</sub> was  
450 not examined, but ROS could conceivably link Bcl-x<sub>L</sub> to changes in mitochondrial dynamics and  
451 function<sup>50</sup>, as well as mitochondrial transcription and retrograde control of nuclear gene  
452 expression<sup>47,51-53</sup>.

453 We examined mitochondrial ROS (mitoROS) levels using the superoxide-specific sensor  
454 MitoSOX and found that deletion of  $\beta$ -cell Bcl-x<sub>L</sub> caused a significant mitoROS increase in NG  
455 cultured cells, and that HG culture amplified mitoROS in cells of both genotypes (Fig. 6a).

456 MitoROS levels could be normalized using the mitochondria-targeted anti-oxidant MitoTEMPO  
457 (Fig. 6a), which substantiates that the mitoROS is mitochondrial and likely ETC-derived. To  
458 determine the metabolic consequences of the observed ROS differences, we cultured Bclx $\beta$ WT  
459 and Bclx $\beta$ KO islets in NG or in HG with and without the addition of MitoTEMPO and then  
460 exposed them to a mitochondrial stress test, which incorporated an acute stimulation with 15 mM  
461 glucose (Fig. 6b). As expected, HG pre-culture elevated basal and glucose-stimulated OCR (Fig.  
462 6c). Respiratory control analysis<sup>18</sup> substantiated our previous observation that  $\beta$ -cell Bcl-XL  
463 deficiency and HG culture impair ATP coupling efficiency, and further showed that this was  
464 associated with the development of a major mitochondrial proton leak (Fig. 6d). Consistent with  
465 the observed increases in mitochondrial mass (Fig. 5f), Bcl-XL deletion and HG culture also notably  
466 amplified spare respiratory capacity. These perturbations to islet respiratory parameters were all  
467 mitigated by lowering of mitoROS levels (Fig. 6d). Scavenging mitoROS during HG culture also  
468 amplified the already elevated Ca<sup>2+</sup> responses to stimulation with low glucose concentrations (Fig.  
469 6e). ROS has roles in physiological signal transduction, but this result indicates that mitoROS  
470 limits, rather than mediates, sensitization of the triggering Ca<sup>2+</sup> signal for glucose-stimulated  
471 insulin secretion in HG-cultured islets.

472 We next assessed the role of mitoROS in the HG-induced changes to  $\beta$ -cell gene  
473 expression. Remarkably, all major glucose-induced transcriptional changes we assessed by qPCR  
474 were partially or fully reversed by normalization of mitochondrial ROS (Fig. 7a,b and  
475 Supplemental Fig. 6). This included rescue of the HG-induced changes related to glycolytic flux  
476 and  $\beta$ -cell identity (*Gck*, *Ldha*, *Pdk1*, *Ins2*, *Mafa*) that were common to both genotypes, as well as  
477 the loss of *Tfam*, and ETC components (*Ndufb8*, *Sdhb*, *Cox4l1*, *Atp5e*) that was specific to  
478 Bclx $\beta$ KO islets.

479 **DISCUSSION**

480 In this study, we characterized the pancreatic  $\beta$ -cell response to sub-lethal levels of glucose  
481 stress, and used conditional gene deletion to determine the role of the anti-apoptotic protein Bcl-  
482  $x_L$  in these processes. In both wild-type and Bcl- $x_L$  knockout islets, prolonged glucose excess  
483 caused a robust transcriptional reprogramming of metabolism toward increased glycolysis and  
484 beginning loss of the mature  $\beta$ -cell identity. These changes to gene expression in large part  
485 resemble the signatures of hyperglycemia-induced  $\beta$ -cell dedifferentiation in partially  
486 pancreatectomized rats<sup>54,55</sup>. Interestingly, our results showed that in glucose-stressed cells, the  
487 transcriptional loss of  $\beta$ -cell identity occurs while there is still compensatory  $\beta$ -cell hyper-function,  
488 and precedes the development of maladaptive ER stress. This indicates that loss of the mature  
489 differentiated  $\beta$ -cell phenotype manifests remarkably early in the progression of glucotoxicity.  
490 Whether this sequence of events differs under other forms of diabetogenic stress is not clear.

491 Maladaptive ER stress, has been proposed as a primary event preceding oxidative and  
492 inflammatory stress in T2D<sup>30</sup>. By all indications, the glucose-induced changes to  $\beta$ -cell UPR  
493 progressed similarly in Bcl $x\beta$ WT and Bcl $x\beta$ KO islets, suggesting that Bcl- $x_L$  does not modulate  
494 the susceptibility of  $\beta$ -cells to ER stress, unlike the pro-apoptotic Bax and Bak<sup>56,57</sup>. Rather, we  
495 identified a mitochondria-specific defect in the absence of Bcl- $x_L$ . Prolonged high-glucose  
496 exposure amplified respiration, but Bcl- $x_L$ -deficient  $\beta$ -cells developed mitochondrial dysfunction  
497 with reduced coupling of ETC flux to  $\Delta\Psi_m$  hyperpolarization and ATP synthesis. Importantly, our  
498 results also revealed that Bcl- $x_L$  is essential for normal  $\beta$ -cell transcription of OXPHOS  
499 components and mitochondrial ribosomes under chronic glucose excess. Overall, the loss of  
500 mitochondrial transcripts in glucose-stressed Bcl $x\beta$ KO islets is similar to the metabolic gene  
501 expression signatures seen 2 weeks after the onset of hyperglycemia in non-obese diabetic mice<sup>6</sup>,

502 and during late stages of diabetes progression in the non-obese GK rat<sup>8</sup>. Bclx $\beta$ KO islets also  
503 showed an exacerbated perturbation of basal and glucose-stimulated Ca<sup>2+</sup> response kinetics.  
504 Together, this suggests that as glucose levels increase, Bcl-xL counteracts mitochondrial  
505 decompensation, and thereby likely the development of a detrimental feed-forward loop of  $\beta$ -cell  
506 dysfunction and worsening hyperglycemia.

507 It is noteworthy that Bclx $\beta$ KO islets remained hyper-responsive despite marked loss of  
508 mitochondria-related gene expression and beginning uncoupling of respiration from  $\Delta\Psi_m$ . The  
509 ability of Bclx $\beta$ KO islets to uphold Ca<sup>2+</sup> and secretory responses in the face of beginning  
510 mitochondrial dysregulation was associated with profound changes to mitochondrial morphology  
511 and volume. Previous work has shown that mitochondrial fusion serves as a protective response to  
512 sustain survival under nutrient stress<sup>58</sup>. Our results indicate that mitochondrial fusion and  
513 expansion of total mitochondrial mass also are integral to functional compensation of  $\beta$ -cells, prior  
514 to the failure and mitochondrial fragmentation that characterizes  $\beta$ -cells in rodents and humans  
515 with established T2D<sup>4-6</sup>. In HG-cultured Bcl-xL KO cells, the total mitochondrial volume increased  
516 despite the absence of glucose-induced *Ppargc1a* expression, which may reflect the presence of  
517 Pgc-1 $\alpha$ -independent mechanisms for maintenance of mitochondrial mass in  $\beta$ -cells<sup>59</sup>.  
518 Alternatively, mitochondrial hyper-fusion in Bcl-xL KO  $\beta$ -cells might contribute to the expansion  
519 of total mass by counteracting mitochondrial degradation by autophagy and mitophagy<sup>60</sup>.

520 Using a mitochondria-targeted antioxidant, we identified sub-lethal formation of mitoROS  
521 as a primary driver of transcriptional changes to both glycolysis and  $\beta$ -cell identity in glucose-  
522 stressed islets. In both NG and HG culture, Bcl-xL-deficient  $\beta$ -cells had higher mitoROS levels  
523 than wild-type. Importantly, mitochondrial antioxidants normalized respiratory coupling and  
524 restored nuclear-encoded mitochondrial gene expression in HG-cultured Bclx $\beta$ KO islets. This



525 indicates that Bcl-xL, protects mitochondrial homeostasis in glucose-stressed  $\beta$ -cells by limiting  
526 the levels of mitoROS. We previously reported that Bcl-2 dampens the physiological formation of  
527 peroxides in  $\beta$ -cells<sup>11</sup>, but a similar role for Bcl-xL was not examined. The excess mitoROS in Bcl-  
528 xL KO  $\beta$ -cells is likely produced in the ETC as a consequence of the overall increase in  
529 mitochondrial respiration. It remains to be established how deletion of Bcl-xL accelerates  $\beta$ -cell  
530 metabolic activity and insulin secretion. The transcriptional profiles of Bclx $\beta$ KO and Bclx $\beta$ KO  
531 islets in normal culture did not indicate differences in major metabolic pathways, so changes to  
532 protein-protein interactions likely play a role. In neurons, Bcl-xL increases metabolic efficiency by  
533 limiting an ion leak conductance through the F<sub>1</sub>F<sub>o</sub> ATPase complex<sup>61</sup>. Loss of such a stabilizing  
534 function may well contribute to proton leak and respiratory uncoupling in Bcl-xL KO  $\beta$ -cells, but  
535 it would be expected to impair glucose-stimulated Ca<sup>2+</sup> entry, insulin secretion and mitoROS  
536 production, in contrast to what we observe. Additional mechanisms are therefore likely at play,  
537 and future metabolomics profiling may help clarify the functions of Bcl-xL in  $\beta$ -cell energetics.

538 In summary, we have identified important functions for Bcl-xL in preserving mitochondrial  
539 integrity in pancreatic  $\beta$ -cells under non-apoptotic levels of metabolic stress. Our findings provide  
540 new insights into non-apoptotic roles Bcl-2 family survival proteins in the control of organelle  
541 physiology. We further revealed central role for mitoROS in both the functional and transcriptional  
542 impact of chronic glucose excess on  $\beta$ -cells. Future work is warranted to clarify the relationship  
543 between Bcl-xL, mitoROS, and mitochondrial homeostasis in the pathogenesis and treatment of  
544 T2D.

545

546

547 **ACKNOWLEDGEMENTS**

548 This work was supported by an Operating Grant to D.S.L. from the Canadian Institutes for Health  
549 Research (CIHR; MOP-119537). D.S.L. was supported by JDRF (CDA 2-2013-50) and BC  
550 Children's Hospital Research Institute (BCCHR). R.S. was supported by a Canada Graduate  
551 Scholarship from CIHR. We acknowledge Dr. Jingsong Wang (BCCHR Imaging Core), as well  
552 as Mei Tang and Mitsuhiro Komba, (BCCHR) for expert technical assistance.

553

554 **DUALITY OF INTEREST**

555 The authors report no conflicts of interest.

556

557 **AUTHOR CONTRIBUTIONS**

558 D.J.P. and R.S. contributed equally to this work. D.J.P., R.S. and D.S.L. designed the study and  
559 wrote the paper. D.J.P., R.S., B.V., A.Z.L.S., Y.Z., A.C. and D.S.L. performed experiments and  
560 analyzed data. D.J.P., R.S., B.V., A.Z.L.S., Y.Z., A.C., B.G.H. and D.S.L interpreted data and  
561 edited the paper.

562

563 **REFERENCES**

564

- 565 1. Irlles, E. *et al.* Enhanced glucose-induced intracellular signaling promotes insulin  
566 hypersecretion: pancreatic beta-cell functional adaptations in a model of genetic obesity  
567 and prediabetes. *Mol Cell Endocrinol* **404**, 46-55 (2015).
- 568 2. Chen, C. *et al.* Alterations in beta-Cell Calcium Dynamics and Efficacy Outweigh Islet  
569 Mass Adaptation in Compensation of Insulin Resistance and Prediabetes Onset. *Diabetes*  
570 **65**, 2676-85 (2016).
- 571 3. Prentki, M., Matschinsky, F.M. & Madiraju, S.R. Metabolic signaling in fuel-induced  
572 insulin secretion. *Cell Metab* **18**, 162-85 (2013).
- 573 4. Anello, M. *et al.* Functional and morphological alterations of mitochondria in pancreatic  
574 beta cells from type 2 diabetic patients. *Diabetologia* **48**, 282-9 (2005).

- 575 5. Dlaskova, A. *et al.* 4Pi microscopy reveals an impaired three-dimensional mitochondrial  
576 network of pancreatic islet beta-cells, an experimental model of type-2 diabetes. *Biochim*  
577 *Biophys Acta* **1797**, 1327-41 (2010).
- 578 6. Haythorne, E. *et al.* Diabetes causes marked inhibition of mitochondrial metabolism in  
579 pancreatic beta-cells. *Nat Commun* **10**, 2474 (2019).
- 580 7. Ebrahimi, A.G. *et al.* Beta cell identity changes with mild hyperglycemia: Implications for  
581 function, growth, and vulnerability. *Mol Metab* **35**, 100959 (2020).
- 582 8. Hou, J. *et al.* Temporal Transcriptomic and Proteomic Landscapes of Deteriorating  
583 Pancreatic Islets in Type 2 Diabetic Rats. *Diabetes* (2017).
- 584 9. Chareyron, I. *et al.* Augmented mitochondrial energy metabolism is an early response to  
585 chronic glucose stress in human pancreatic beta cells. *Diabetologia* (2020).
- 586 10. Gross, A. & Katz, S.G. Non-apoptotic functions of BCL-2 family proteins. *Cell Death*  
587 *Differ* **24**, 1348-1358 (2017).
- 588 11. Aharoni-Simon, M. *et al.* Bcl-2 Regulates Reactive Oxygen Species Signaling and a  
589 Redox-Sensitive Mitochondrial Proton Leak in Mouse Pancreatic beta-Cells.  
590 *Endocrinology* **157**, 2270-81 (2016).
- 591 12. Luciani, D.S. *et al.* Bcl-2 and Bcl-xL Suppress Glucose Signaling in Pancreatic beta-Cells.  
592 *Diabetes* **62**, 170-82 (2013).
- 593 13. Zhou, Y.P. *et al.* Overexpression of Bcl-x(L) in beta-cells prevents cell death but impairs  
594 mitochondrial signal for insulin secretion. *Am J Physiol Endocrinol Metab* **278**, E340-51  
595 (2000).
- 596 14. Danial, N.N. *et al.* Dual role of proapoptotic BAD in insulin secretion and beta cell  
597 survival. *Nat Med* **14**, 144-53 (2008).
- 598 15. Ahn, S.H. *et al.* Tamoxifen suppresses pancreatic beta-cell proliferation in mice. *PLoS One*  
599 **14**, e0214829 (2019).
- 600 16. Carboneau, B.A., Le, T.D., Dunn, J.C. & Gannon, M. Unexpected effects of the MIP-  
601 CreER transgene and tamoxifen on beta-cell growth in C57Bl6/J male mice. *Physiol Rep*  
602 **4**(2016).
- 603 17. Luciani, D.S., Ao, P., Hu, X., Warnock, G.L. & Johnson, J.D. Voltage-gated Ca(2+) influx  
604 and insulin secretion in human and mouse beta-cells are impaired by the mitochondrial  
605 Na(+)/Ca(2+) exchange inhibitor CGP-37157. *Eur J Pharmacol* **576**, 18-25 (2007).
- 606 18. Brand, M.D. & Nicholls, D.G. Assessing mitochondrial dysfunction in cells. *Biochem J*  
607 **435**, 297-312 (2011).
- 608 19. Chaudhry, A., Shi, R. & Luciani, D.S. A pipeline for multidimensional confocal analysis  
609 of mitochondrial morphology, function, and dynamics in pancreatic beta-cells. *Am J*  
610 *Physiol Endocrinol Metab* **318**, E87-E101 (2020).
- 611 20. Chaudhry, A. & Luciani, D.S. Mitochondria Analyzer.  
612 (<https://github.com/AhsenChaudhry/Mitochondria-Analyzer>, 2019).
- 613 21. Hemel, I., Engelen, B.P.H., Lubber, N. & Gerards, M. A hitchhiker's guide to mitochondrial  
614 quantification. *Mitochondrion* **59**, 216-224 (2021).
- 615 22. Bolger, A.M., Lohse, M. & Usadel, B. Trimmomatic: a flexible trimmer for Illumina  
616 sequence data. *Bioinformatics* **30**, 2114-20 (2014).
- 617 23. Patro, R., Duggal, G., Love, M.I., Irizarry, R.A. & Kingsford, C. Salmon provides fast and  
618 bias-aware quantification of transcript expression. *Nat Methods* **14**, 417-419 (2017).
- 619 24. Sonesson, C., Love, M.I. & Robinson, M.D. Differential analyses for RNA-seq: transcript-  
620 level estimates improve gene-level inferences. *F1000Res* **4**, 1521 (2015).

- 621 25. Love, M.I., Huber, W. & Anders, S. Moderated estimation of fold change and dispersion  
622 for RNA-seq data with DESeq2. *Genome Biol* **15**, 550 (2014).
- 623 26. Zhu, A., Ibrahim, J.G. & Love, M.I. Heavy-tailed prior distributions for sequence count  
624 data: removing the noise and preserving large differences. *Bioinformatics* **35**, 2084-2092  
625 (2019).
- 626 27. Huang da, W., Sherman, B.T. & Lempicki, R.A. Bioinformatics enrichment tools: paths  
627 toward the comprehensive functional analysis of large gene lists. *Nucleic Acids Res* **37**, 1-  
628 13 (2009).
- 629 28. Huang da, W., Sherman, B.T. & Lempicki, R.A. Systematic and integrative analysis of  
630 large gene lists using DAVID bioinformatics resources. *Nat Protoc* **4**, 44-57 (2009).
- 631 29. Luciani, D.S. *et al.* Roles of IP<sub>3</sub>R and RyR Ca<sup>2+</sup> channels in endoplasmic reticulum stress  
632 and beta-cell death. *Diabetes* **58**, 422-32 (2009).
- 633 30. Chan, J.Y. *et al.* The balance between adaptive and apoptotic unfolded protein responses  
634 regulates beta-cell death under ER stress conditions through XBP1, CHOP and JNK. *Mol*  
635 *Cell Endocrinol* **413**, 189-201 (2015).
- 636 31. Federici, M. *et al.* High glucose causes apoptosis in cultured human pancreatic islets of  
637 Langerhans: a potential role for regulation of specific Bcl family genes toward an apoptotic  
638 cell death program. *Diabetes* **50**, 1290-301 (2001).
- 639 32. Bensellam, M., Montgomery, M.K., Luzuriaga, J., Chan, J.Y. & Laybutt, D.R. Inhibitor of  
640 differentiation proteins protect against oxidative stress by regulating the antioxidant-  
641 mitochondrial response in mouse beta cells. *Diabetologia* **58**, 758-70 (2015).
- 642 33. Tanaka, Y., Tran, P.O., Harmon, J. & Robertson, R.P. A role for glutathione peroxidase in  
643 protecting pancreatic beta cells against oxidative stress in a model of glucose toxicity. *Proc*  
644 *Natl Acad Sci U S A* **99**, 12363-8 (2002).
- 645 34. Bensellam, M. *et al.* Phlda3 regulates beta cell survival during stress. *Sci Rep* **9**, 12827  
646 (2019).
- 647 35. Kale, J., Osterlund, E.J. & Andrews, D.W. BCL-2 family proteins: changing partners in  
648 the dance towards death. *Cell Death Differ* (2017).
- 649 36. Pullen, T.J. *et al.* Identification of genes selectively disallowed in the pancreatic islet. *Islets*  
650 **2**, 89-95 (2010).
- 651 37. Pullen, T.J. & Rutter, G.A. When less is more: the forbidden fruits of gene repression in  
652 the adult beta-cell. *Diabetes Obes Metab* **15**, 503-12 (2013).
- 653 38. Kim-Muller, J.Y. *et al.* Aldehyde dehydrogenase 1a3 defines a subset of failing pancreatic  
654 beta cells in diabetic mice. *Nat Commun* **7**, 12631 (2016).
- 655 39. Kuo, T. *et al.* Induction of alpha cell-restricted Gc in dedifferentiating beta cells contributes  
656 to stress-induced beta-cell dysfunction. *JCI Insight* **5**(2019).
- 657 40. Mookerjee, S.A., Gerencser, A.A., Nicholls, D.G. & Brand, M.D. Quantifying intracellular  
658 rates of glycolytic and oxidative ATP production and consumption using extracellular flux  
659 measurements. *J Biol Chem* **292**, 7189-7207 (2017).
- 660 41. Kukat, C. *et al.* Cross-strand binding of TFAM to a single mtDNA molecule forms the  
661 mitochondrial nucleoid. *Proc Natl Acad Sci U S A* **112**, 11288-93 (2015).
- 662 42. Gauthier, B.R. *et al.* PDX1 deficiency causes mitochondrial dysfunction and defective  
663 insulin secretion through TFAM suppression. *Cell Metab* **10**, 110-8 (2009).
- 664 43. Silva, J.P. *et al.* Impaired insulin secretion and beta-cell loss in tissue-specific knockout  
665 mice with mitochondrial diabetes. *Nat Genet* **26**, 336-40 (2000).

- 666 44. Eisner, V., Picard, M. & Hajnoczky, G. Mitochondrial dynamics in adaptive and  
667 maladaptive cellular stress responses. *Nat Cell Biol* **20**, 755-765 (2018).
- 668 45. Chan, D.C. Mitochondrial Dynamics and Its Involvement in Disease. *Annu Rev Pathol*  
669 (2019).
- 670 46. Pearson, G.L., Gingerich, M.A., Walker, E.M., Biden, T.J. & Soleimanpour, S.A. A  
671 Selective Look at Autophagy in Pancreatic beta-Cells. *Diabetes* **70**, 1229-1241 (2021).
- 672 47. Ploumi, C., Daskalaki, I. & Tavernarakis, N. Mitochondrial biogenesis and clearance: a  
673 balancing act. *FEBS J* **284**, 183-195 (2017).
- 674 48. Berman, S.B. *et al.* Bcl-x L increases mitochondrial fission, fusion, and biomass in  
675 neurons. *J Cell Biol* **184**, 707-19 (2009).
- 676 49. Campbell, J.E. & Newgard, C.B. Mechanisms controlling pancreatic islet cell function in  
677 insulin secretion. *Nat Rev Mol Cell Biol* **22**, 142-158 (2021).
- 678 50. Willems, P.H., Rossignol, R., Dieteren, C.E., Murphy, M.P. & Koopman, W.J. Redox  
679 Homeostasis and Mitochondrial Dynamics. *Cell Metab* **22**, 207-18 (2015).
- 680 51. Quiros, P.M., Mottis, A. & Auwerx, J. Mitonuclear communication in homeostasis and  
681 stress. *Nat Rev Mol Cell Biol* **17**, 213-26 (2016).
- 682 52. da Cunha, F.M., Torelli, N.Q. & Kowaltowski, A.J. Mitochondrial Retrograde Signaling:  
683 Triggers, Pathways, and Outcomes. *Oxid Med Cell Longev* **2015**, 482582 (2015).
- 684 53. Picard, M., Shirihai, O.S., Gentil, B.J. & Burelle, Y. Mitochondrial morphology transitions  
685 and functions: implications for retrograde signaling? *Am J Physiol Regul Integr Comp*  
686 *Physiol* **304**, R393-406 (2013).
- 687 54. Laybutt, D.R. *et al.* Critical reduction in beta-cell mass results in two distinct outcomes  
688 over time. Adaptation with impaired glucose tolerance or decompensated diabetes. *J Biol*  
689 *Chem* **278**, 2997-3005 (2003).
- 690 55. Jonas, J.C. *et al.* Chronic hyperglycemia triggers loss of pancreatic beta cell differentiation  
691 in an animal model of diabetes. *J Biol Chem* **274**, 14112-21 (1999).
- 692 56. White, S.A., Zhang, L.S., Pasula, D.J., Yang, Y.H.C. & Luciani, D.S. Bax and Bak jointly  
693 control survival and dampen the early unfolded protein response in pancreatic beta-cells  
694 under glucolipotoxic stress. *Sci Rep* **10**, 10986 (2020).
- 695 57. Hetz, C. *et al.* Proapoptotic BAX and BAK modulate the unfolded protein response by a  
696 direct interaction with IRE1alpha. *Science* **312**, 572-6 (2006).
- 697 58. Molina, A.J. *et al.* Mitochondrial networking protects beta-cells from nutrient-induced  
698 apoptosis. *Diabetes* **58**, 2303-15 (2009).
- 699 59. Oropeza, D. *et al.* PGC-1 coactivators in beta-cells regulate lipid metabolism and are  
700 essential for insulin secretion coupled to fatty acids. *Mol Metab* **4**, 811-22 (2015).
- 701 60. Twig, G. *et al.* Fission and selective fusion govern mitochondrial segregation and  
702 elimination by autophagy. *EMBO J* **27**, 433-46 (2008).
- 703 61. Alavian, K.N. *et al.* Bcl-x(L) regulates metabolic efficiency of neurons through interaction  
704 with the mitochondrial F(1)F(O) ATP synthase. *Nat Cell Biol* (2011).

705

706

707



## 708 FIGURE LEGENDS

### 709 **Figure 1. Effects of prolonged high glucose culture on islet transcriptome, stress pathways** 710 **and survival.**

- 711 a) Schematic illustration of protocol for metabolic challenge experiment. NG = normal glucose  
712 (11 mM glucose RPMI media), HG = high glucose (25 mM glucose RPMI media).
- 713 b) Pathway enrichment analysis of transcripts that were altered in HG-cultured islets compared  
714 to NG-cultured islets from Bclx $\beta$ WT and Bclx $\beta$ KO mice. *Top grey*: Pathways associated with  
715 transcripts that were differentially expressed in both genotypes. *Bottom*: Pathways associated  
716 with transcripts that were uniquely affected in one of the genotypes. Black = Bclx $\beta$ WT, Red =  
717 Bclx $\beta$ KO. The number of transcripts in each category is indicated by each bar (n=3  
718 independent islet cDNA library preparations).
- 719 c) Heat map of genes that were differentially expressed in both Bclx $\beta$ WT and Bclx $\beta$ KO islets  
720 after HG culture and are associated with the Gene Ontology term “Cellular response to ER  
721 stress” (GO:003497).
- 722 d) Heat map of genes that were differentially expressed in both Bclx $\beta$ WT and Bclx $\beta$ KO islets  
723 after HG culture and are associated with the Gene Ontology term “Oxidative Stress Response”  
724 (GO: 0006979).
- 725 e) Select ER stress-related gene expression changes quantified by qPCR (n=6).
- 726 f) Select oxidative-stress related gene expression changes quantified by qPCR (n=6).
- 727 g) Death of Bcl-X<sub>L</sub> WT and Bcl-X<sub>L</sub> KO cells after islet culture in 11 mM glucose (11G) or 25 mM  
728 glucose (25G) for 6 days (n=3). No significant differences by two-way ANOVA.
- 729 h) Death of Bcl-X<sub>L</sub> WT and Bcl-X<sub>L</sub> KO cells after culture in 25 mM ribose (25R) or 50 mM ribose  
730 (50R) for 4 days (n=5).

731 In all panels, \* $p$ <0.05, \*\* $p$ <0.01 by two-way ANOVA followed by Šidák’s multiple comparison.  
732

### 733 **Figure 2. Prolonged exposure to high glucose transcriptionally re-wires $\beta$ -cell glycolysis and** 734 **identity.**

- 735 a) Heat map of differentially expressed glycolytic genes common to Bclx $\beta$ WT and Bclx $\beta$ KO  
736 islets after 6 days culture in high glucose (HG) compared to normal glucose (NG; n=3 cDNA  
737 library preparations).
- 738 b) qPCR quantification of select transcripts confirming key RNA-Seq findings in panel a (n=6).
- 739 c) Schematic illustrating the re-wiring of glycolysis in Bclx $\beta$ WT and Bclx $\beta$ KO islets after  
740 prolonged high glucose exposure. The transcriptional signature shows loss of  $\beta$ -cell genes  
741 *Slc2a2* and *Gck*, up-regulation of general glycolytic transcripts, and redirection of glucose-  
742 derived pyruvate from mitochondria toward lactate production.
- 743 d) Heat map showing HG-induced changes to expression of key genes related to  $\beta$ -cell identity.  
744 The overall transcriptional signature is consistent with loss of the mature  $\beta$ -cell phenotype and  
745 beginning  $\beta$ -cell dedifferentiation in HG-cultured islets of both genotypes.
- 746 e) qPCR confirmation of HG-induced decrease in the expression of the  $\beta$ -cell identity genes *Mafa*  
747 and *Ins2* (n=6).

748 In all panels, \* $p$ <0.05, \*\* $p$ <0.01, \*\*\* $p$ <0.001 and \*\*\*\* $p$ <0.0001 by two-way ANOVA followed  
749 by Šidák’s multiple comparison test.

750 **Figure 3. Prolonged exposure to excess glucose perturbs islet Ca<sup>2+</sup> dynamics, sensitizes**  
751 **glucose-stimulated Ca<sup>2+</sup> responses and amplifies insulin secretion.**

- 752 a) Representative cytosolic Ca<sup>2+</sup> responses in glucose-stimulated BclxβWT and BclxβKO islets  
753 after 2d culture in 11 mM glucose (NG; *left panel*) or 25 mM glucose (HG; *middle panel*), as  
754 well as quantification of the percentage of islets showing plateau responses (*right panel*; n=5,  
755 between 1 and 14 islets in each experiment).
- 756 b) Average glucose-induced cytosolic islet Ca<sup>2+</sup> responses of BclxβWT and BclxβKO islets after  
757 6 days culture in NG and HG. Gray hanging bars represent SEM (NG n=5 and HG n=3 with  
758 between 4 and 10 islets in each experiment)
- 759 c) Quantification of average islet Ca<sup>2+</sup> levels during the baseline (1), peak (2), steady-state (3)  
760 and recovery (4) stages of the glucose response, as indicated in panel b (NG n=5 and HG n=3,  
761 \**p*<0.05 by multiple t-tests).
- 762 d) Islet cytosolic Ca<sup>2+</sup> responses to metabolism-independent islet depolarization with 30 mM KCl  
763 in the presence of basal 3 mM glucose. Each trace is the averages of 4-9 islets from 3 mice of  
764 each genotype. Traces are shown without error bars to better highlight the on- and off-rates of  
765 the responses.
- 766 e) Representative example of BclxβWT islet Ca<sup>2+</sup> responses to step-wise glucose ramp  
767 stimulation after NG or HG culture.
- 768 f) Integrated concentration-response profiles (area under the curve; AUC) demonstrating similar  
769 glucose sensitization of BclxβWT and BclxβKO islet Ca<sup>2+</sup> responses after NG and HG culture  
770 (Total 70 islets from n=4 mice. \*\**p*<0.01 by two-way repeated measures ANOVA followed  
771 by Sidak's multiple comparisons test).
- 772 g) Glucose concentration-response profiles of insulin secretion from BclxβWT and BclxβKO  
773 islets after culture in NG and HG (n=6, \**p*<0.05 by two-way ANOVA of AUC values matched  
774 across each experiment, followed by Sidak's multiple comparisons test).

775

776 **Figure 4. Bcl-x<sub>L</sub> preserves the expression of mitochondrial transcripts and glucose-**  
777 **stimulated mitochondrial hyperpolarization during high glucose-stress.**

- 778 a) Venn diagram of differentially expressed genes between BclxβWT and BclxβKO islets after 6  
779 days culture in normal glucose (11 mM; NG) or high glucose (25 mM; HG).
- 780 b) Top cell component GO terms identified by enrichment analysis and functional annotation of  
781 the differentially expressed genes between HG-cultured BclxβWT and BclxβKO islets. The  
782 number of transcripts in each category is indicated by the bars.
- 783 c) Heat map of select differentially expressed genes from the top CC GO-category  
784 "Mitochondrion" in panel b.
- 785 d) qPCR quantification of select OXPHOS-related transcripts confirming key RNA-Seq findings  
786 in panels a-c (n=6, \**p*<0.05, \*\**p*<0.01 by two-way ANOVA followed by Tukey's multiple  
787 comparisons test).
- 788 e) *Left* - Total oxygen consumption rates (OCR<sub>tot</sub>) of NG- and HG-cultured BclxβWT and  
789 BclxβKO islets in response to stimulation with progressive increases in extracellular glucose  
790 (n=6; \*\**p*<0.01, \*\*\**p*<0.001 by Two-way ANOVA followed by Tukey's multiple  
791 comparisons test). *Right* - Fraction of total OCR that is coupled to ATP synthesis in the

792 presence of 15 mM glucose (n=4, \*\* $p < 0.01$  by two-way ANOVA followed by Tukey's  
793 multiple comparisons test).

794 f) *Left* – Examples of  $\beta$ -cells double-stained with MitoTracker Green (MTG;  $\Delta\Psi_m$ -insensitive)  
795 and TMRE ( $\Delta\Psi_m$ -sensitive) in the presence of basal 3 mM glucose (3G) and stimulatory 17  
796 mM glucose (17G). *Right* – Quantification of the effects of acute glucose stimulation on  $\Delta\Psi_m$   
797 (TMRE/MTG ratio) in NG- and HG-cultured cells (87 to 91 cells in each group from 7 mice  
798 of each genotype; \* $p < 0.05$ , \*\*\* $p < 0.001$ , \*\*\*\* $p < 0.0001$  by one-way ANOVA followed by  
799 Sidak's multiple comparisons test).

800

801 **Figure 5. Bcl-x<sub>L</sub> KO  $\beta$ -cells respond to prolonged high glucose with higher mitochondrial**  
802 **network complexity, increased mitochondrial volume, and augmented insulin secretion in**  
803 **the amplifying pathway.**

804 a) qPCR quantification of *Tfam* and *Pgc-1 $\alpha$*  mRNA in Bclx $\beta$ WT and Bclx $\beta$ KO islets following  
805 6 days culture in NG and HG (n=6).

806 b) qPCR analysis of the expression of key mediators of mitochondrial fusion (*Mfn1*, *Mfn2*) in  
807 Bclx $\beta$ WT and Bclx $\beta$ KO islets after 6 days culture in NG or HG (n=6).

808 c) Schematic illustration of workflow for generation of training set for machine learning-based  
809 classification of 3D mitochondrial morphometric features.

810 d) *Left*: Examples of 3D confocal reconstruction of mitochondrial networks in Bcl-x<sub>L</sub> WT and  
811 Bcl-x<sub>L</sub> KO cells. *Right*: Machine learning-based classification of mitochondrial morphology  
812 distributions in Bcl-x<sub>L</sub>WT and Bcl-x<sub>L</sub> KO cells after NG or HG culture. (3 mice of each  
813 genotype. 30 cells were examined from each mouse and a total of 120 cells and ~16,000  
814 individual were mitochondria classified).

815 e) Parallel coordinates plot comparing normalized means of all extracted mitochondrial  
816 morphometric and network complexity features across genotypes and culture conditions.

817 f) Quantification of average mitochondrial volume and total mitochondrial volume in NG- and  
818 HG-cultured cells (n=30 cells per genotype in each condition).

819 g) Comparison of the amplifying pathway of insulin secretion in NG- and HG-cultured Bclx $\beta$ WT  
820 and Bclx $\beta$ KO islets. Plasma membrane potential was uncoupled from  $\beta$ -cell glucose  
821 metabolism by clamping ATP-sensitive K<sup>+</sup>-channels open with 250  $\mu$ M diazoxide (DZ).  
822 Insulin secretion was then measured following direct depolarization by 30 mM KCl in the  
823 presence of 3 mM glucose or 15 mM glucose (n=6).

824 In all panels, \* $p < 0.05$ , \*\* $p < 0.01$  by two-way ANOVA followed by multiple comparisons tests.

825

826 **Figure 6. Bcl-x<sub>L</sub>-dependent regulation of mitoROS preserves ATP-coupled islet respiration**  
827 **and limits the sensitization of basal Ca<sup>2+</sup> responsiveness during high glucose-stress.**

828 a) Mitochondrial superoxide (mitoROS) levels imaged by MitoSox staining in Bclx $\beta$ WT and  
829 Bclx $\beta$ KO islet cells after 6 days culture in NG or HG with and without the addition of 10  $\mu$ M  
830 mitoTEMPO (276 to 427 cells in each group from 2 independent preparations).

831 b) Example of Seahorse mitochondrial stress tests on Bclx $\beta$ WT and Bclx $\beta$ KO islets after HG  
832 culture with and without the addition of mitoTEMPO (MT). At the indicated time-points wells  
833 were injected with 15 mM glucose, 1  $\mu$ M oligomycin (Oligo), 2  $\mu$ M FCCP, and a combination



834 of 1  $\mu\text{M}$  Rotenone and 1  $\mu\text{M}$  antimycin A (Rot/Ant). For a clearer comparison, NG-cultured  
835 islet traces are not shown, but are included in the quantifications in panel c.

836 c) Respiratory control analysis based on mitochondrial stress tests of Bclx $\beta$ WT and Bclx $\beta$ KO  
837 islets after culture in NG, or in HG with and without mitoTEMPO (n=3-5 islet preparations in  
838 each group).

839 d) Integrated Ca<sup>2+</sup> responses (area under the curve; AUC) to stimulation by a step-wise glucose  
840 ramp. Responses of Bclx $\beta$ WT and Bclx $\beta$ KO islets were measured after 6 days NG culture, and  
841 after HG culture with and without the addition of mitoTEMPO (MT; n=3, 4-9 islets per  
842 experiment).

843 In panels a & c \* $p$ <0.05, \*\* $p$ <0.01, \*\*\* $p$ <0.001, \*\*\*\* $p$ <0.0001 by one-way ANOVA followed by  
844 multiple comparison tests. In panel d, \*\*\*\* $p$ <0.0001 by two-way ANOVA followed by Tukey's  
845 multiple comparisons test.

846

847 **Figure 7. High glucose-induced transcriptional dysregulation in Bclx<sub>L</sub>-deficient  $\beta$ -cells is**  
848 **driven by mitoROS.**

849 a) qPCR quantification of select mRNAs in Bclx $\beta$ WT and Bclx $\beta$ KO islets following 6 days  
850 culture in NG and HG with and without the addition of 10  $\mu\text{M}$  mitoTEMPO (n=6; \* $p$ <0.05,  
851 \*\* $p$ <0.01, \*\*\* $p$ <0.001, \*\*\*\* $p$ <0.0001 by one-way ANOVA followed by Tukey's multiple  
852 comparison tests).

853 Heat map summarizing qPCR quantification of islet mRNAs after culture in NG, or in HG with  
854 and without mitoTempo (MT). *Top*: transcripts that were down-regulated in HG. *Bottom*:  
855 transcripts that were up-regulated in HG. All corresponding qPCR data are shown in panel a and  
856 Supplemental Figure 5.

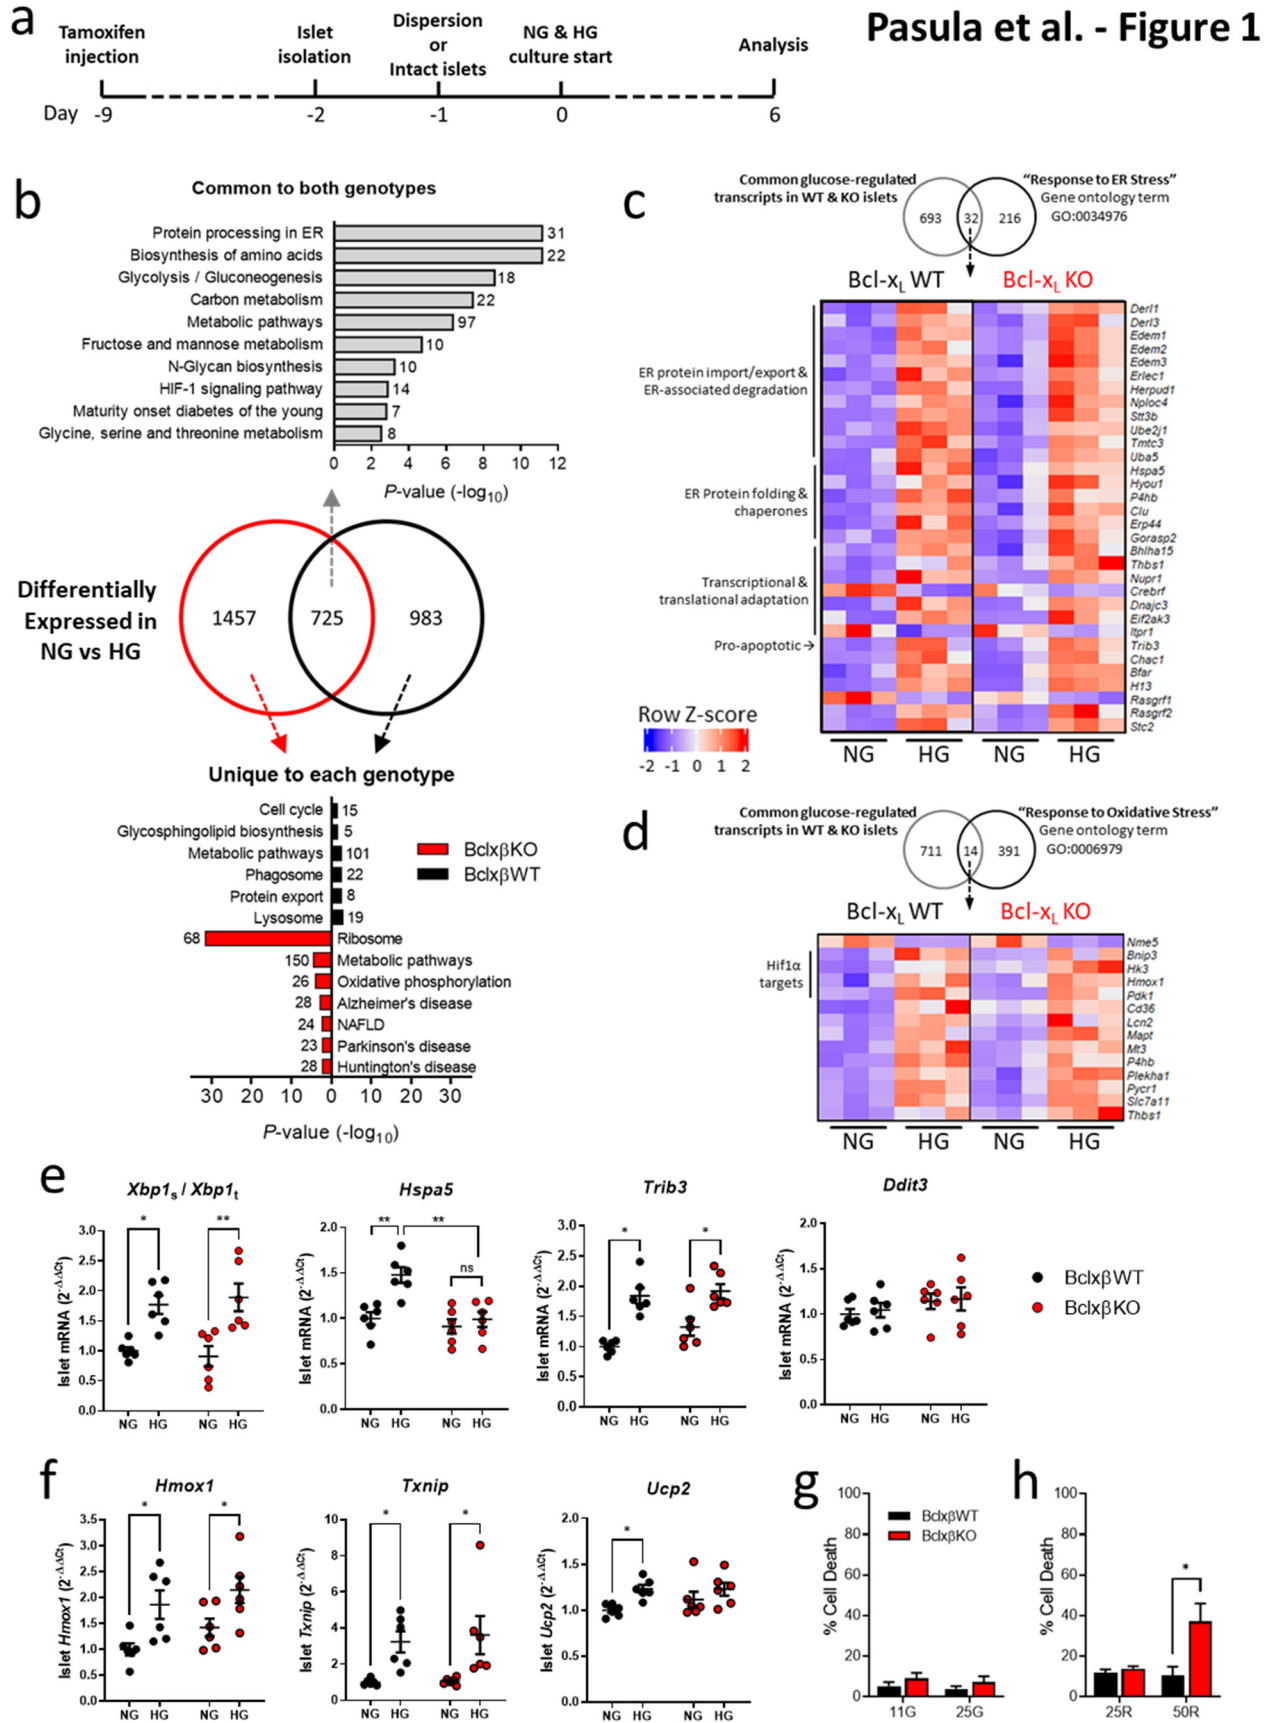

## Pasula et al. - Figure 2

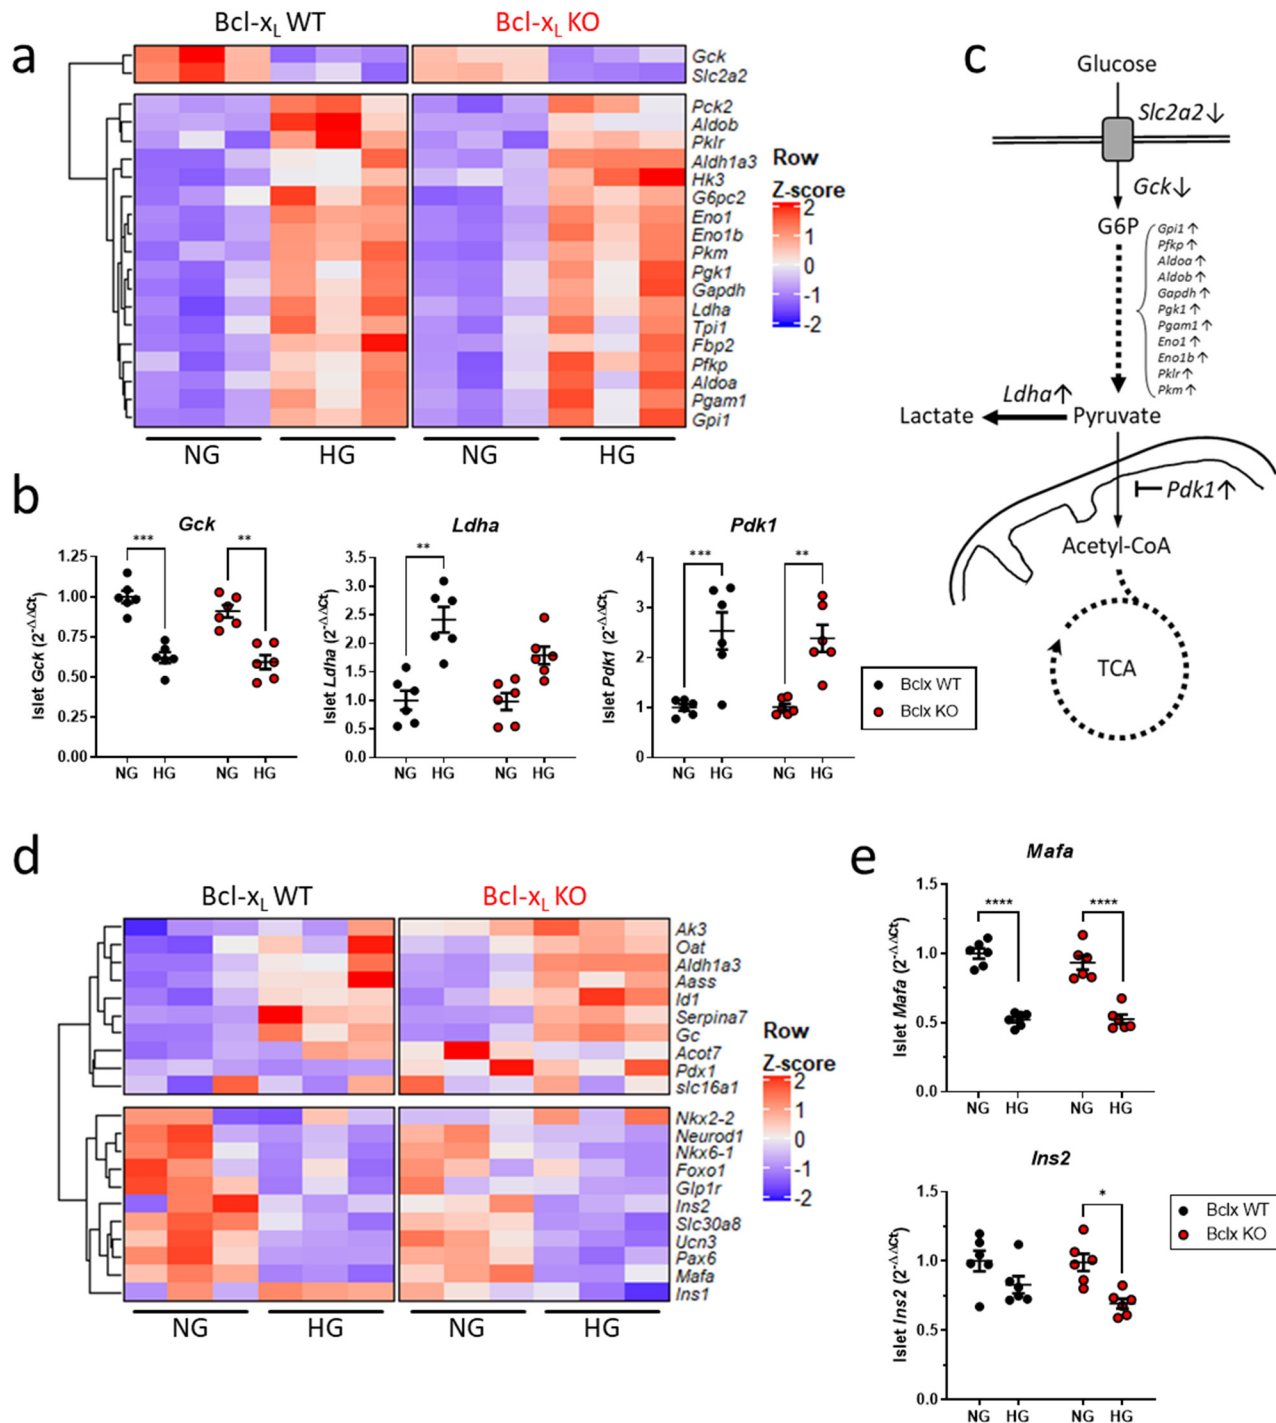

## Pasula et al. - Figure 3

### a 2 days culture

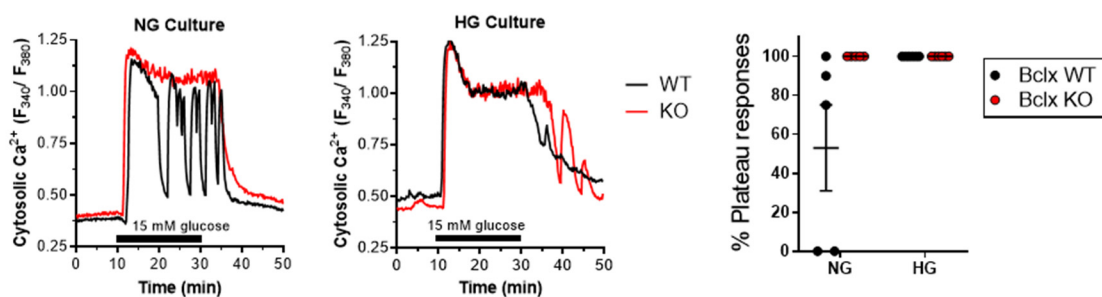

### b 6 days culture

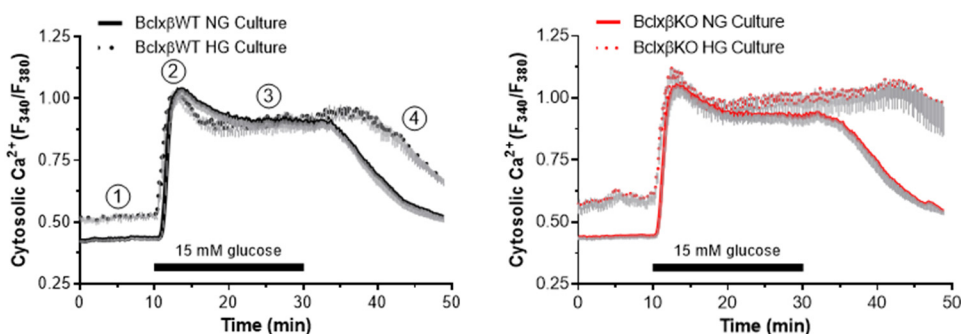

### c

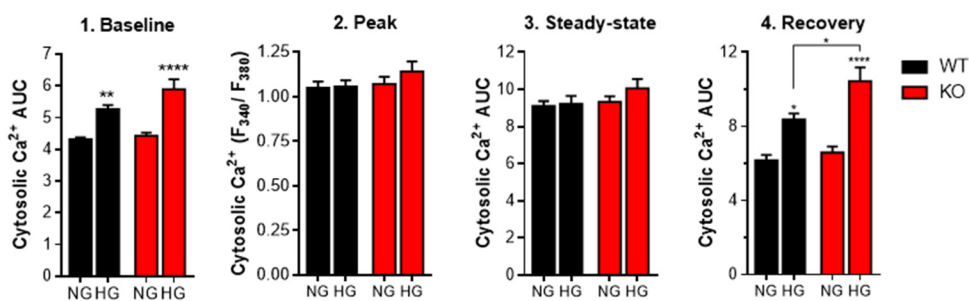

### d

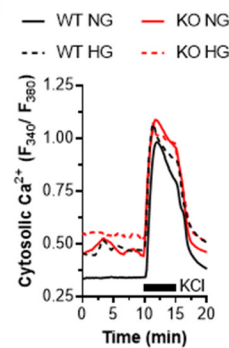

### e

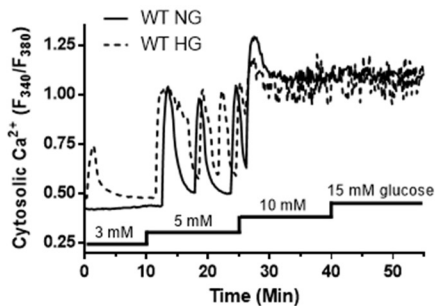

### f

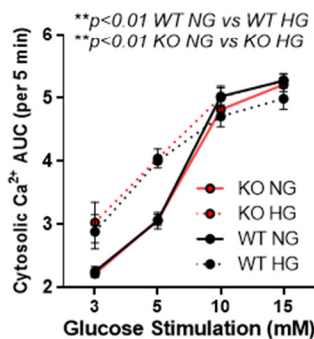

### g

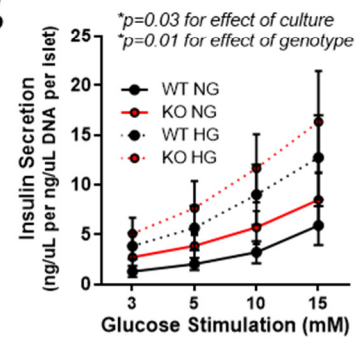

## Pasula et al. - Figure 4

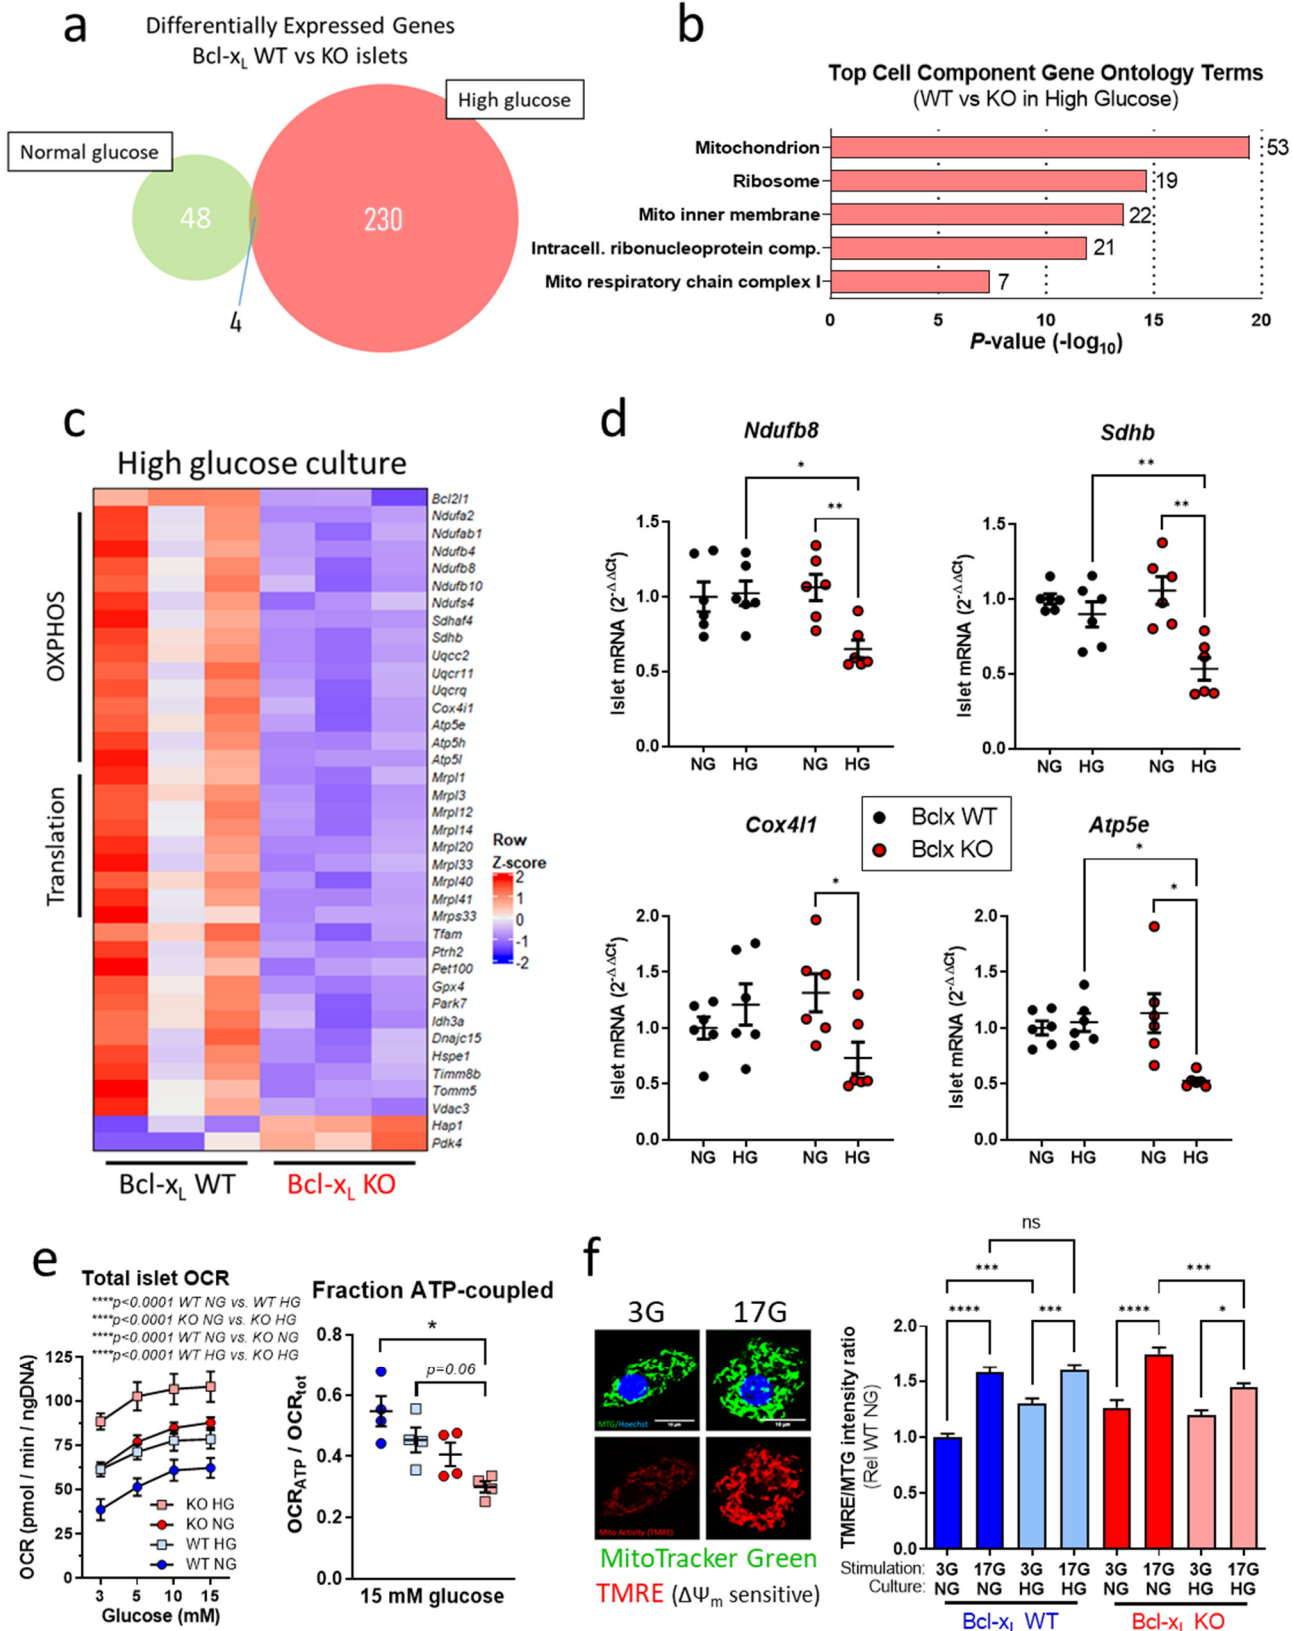



## Pasula et al. - Figure 5

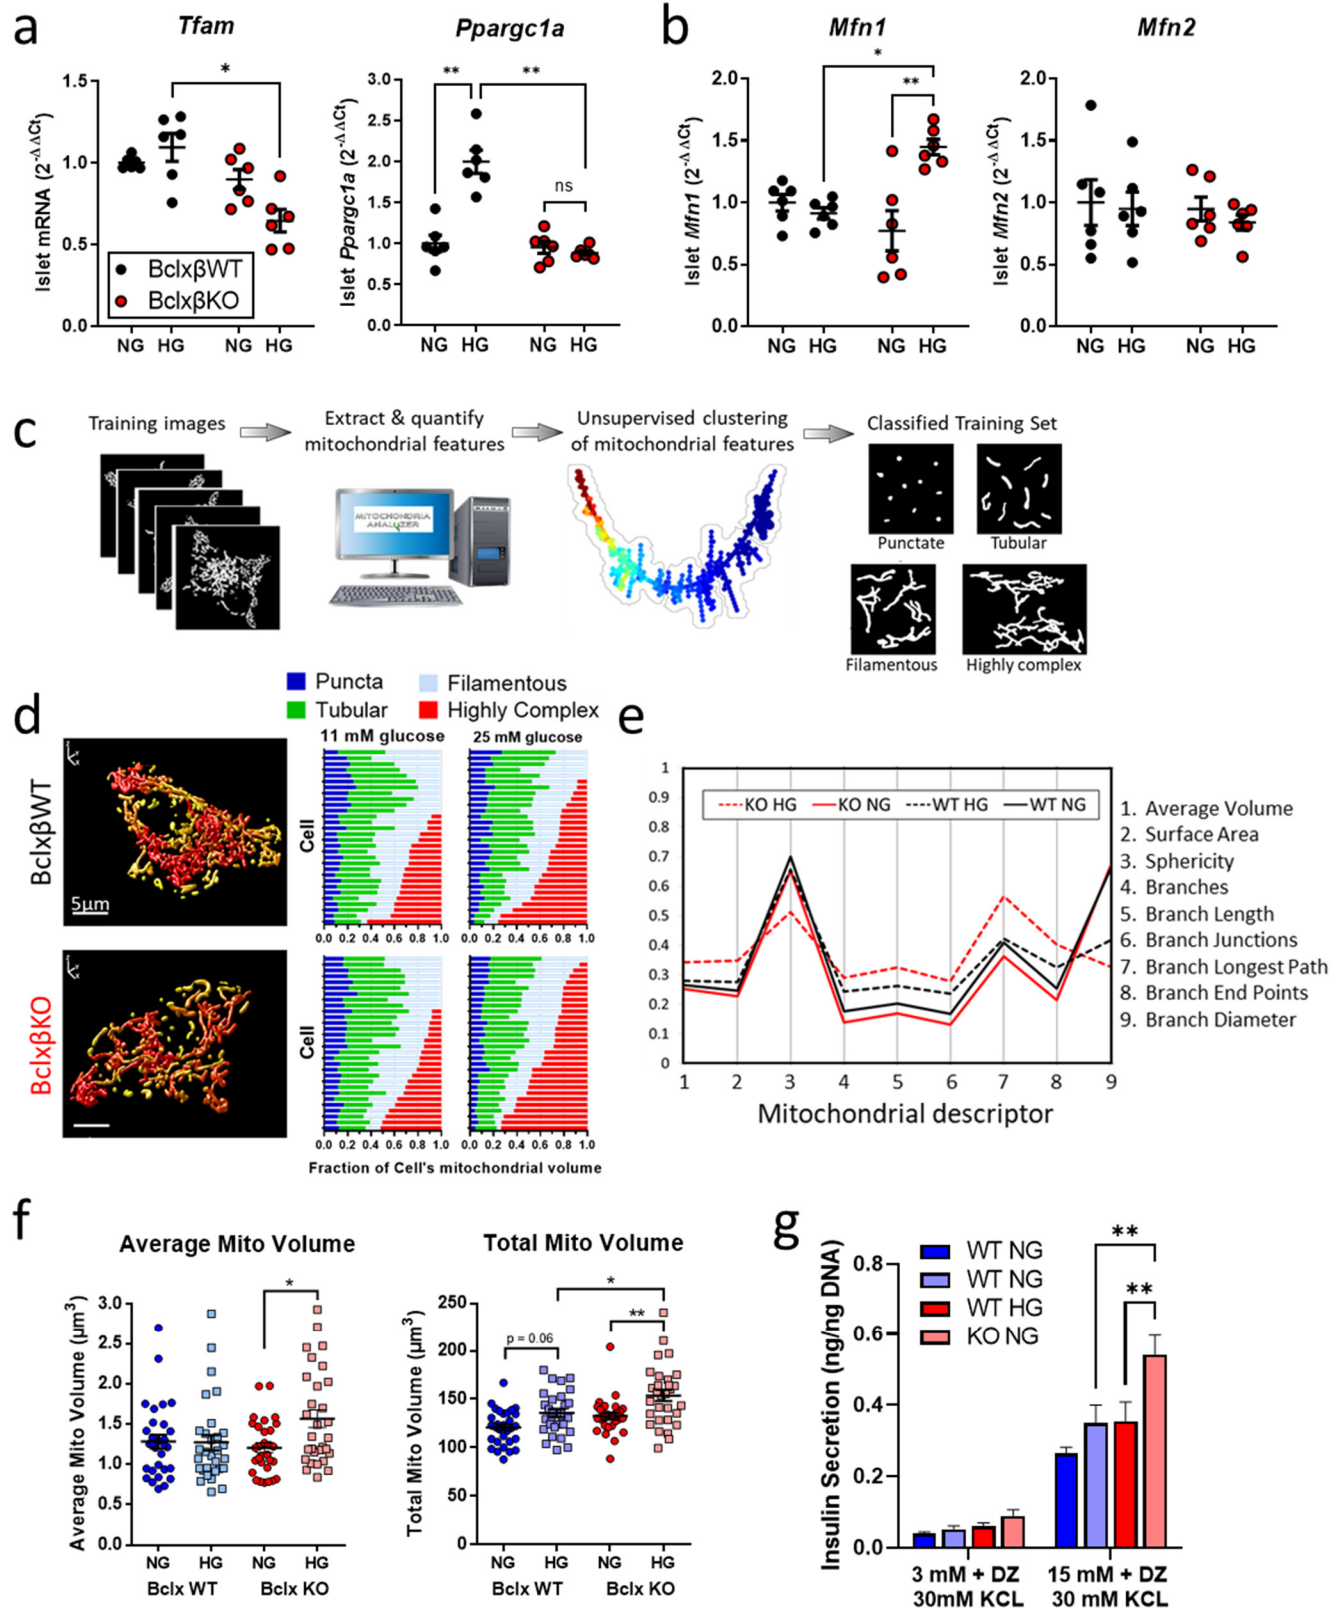

## Pasula et al. - Figure 6

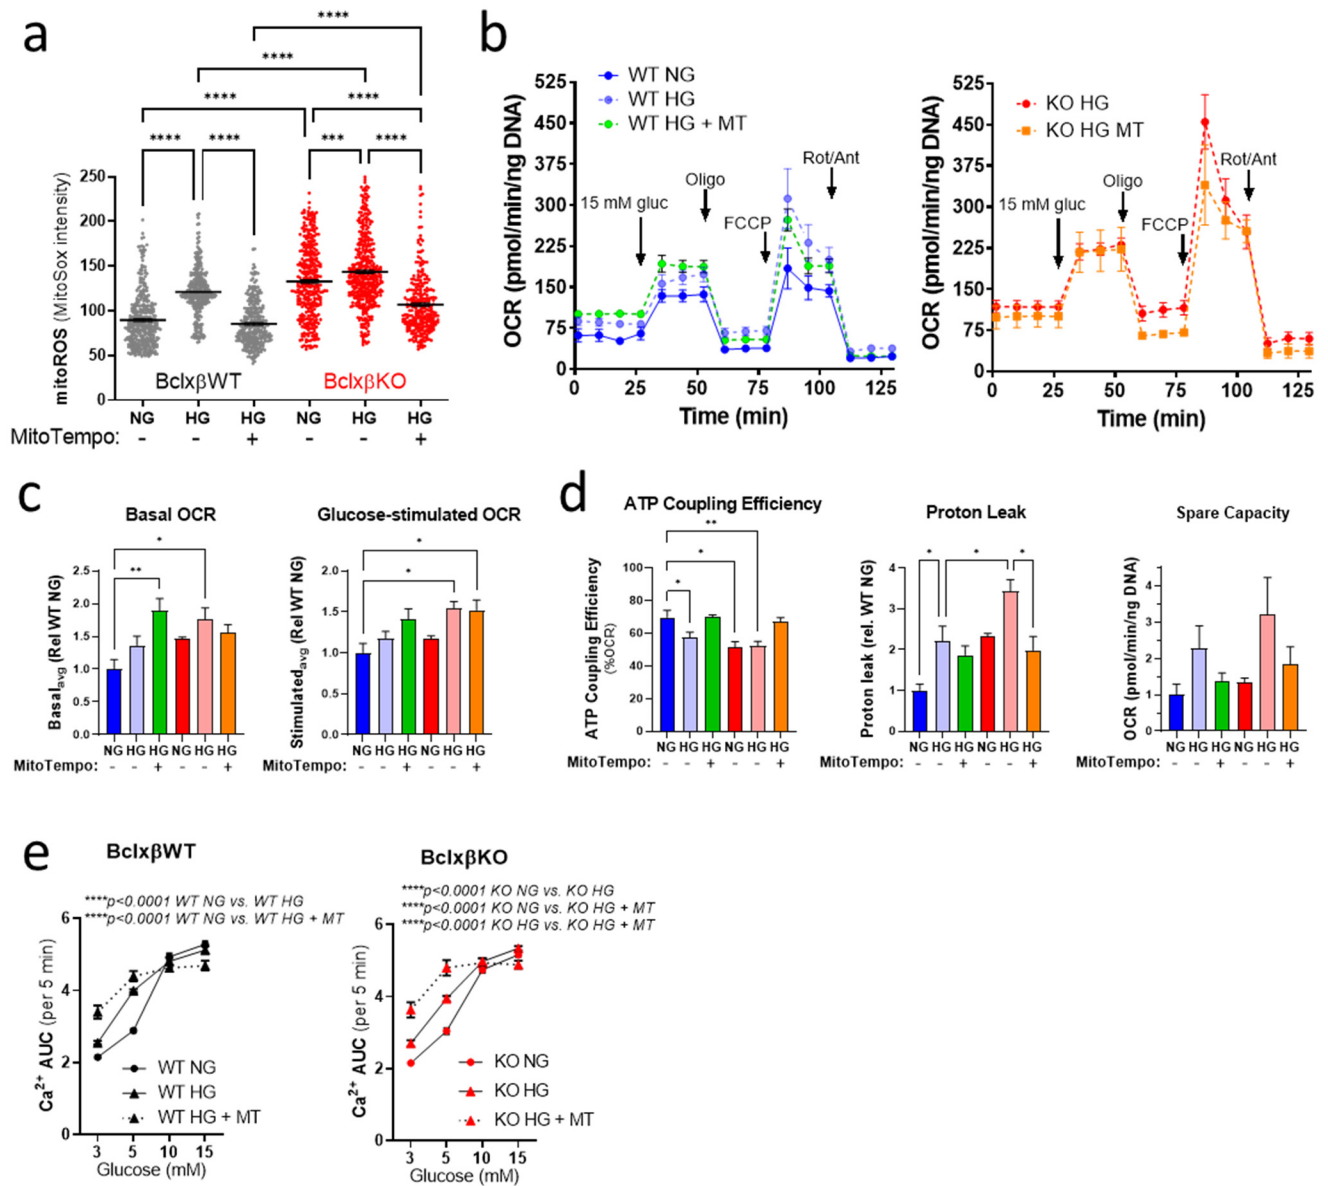

## Pasula et al. - Figure 7

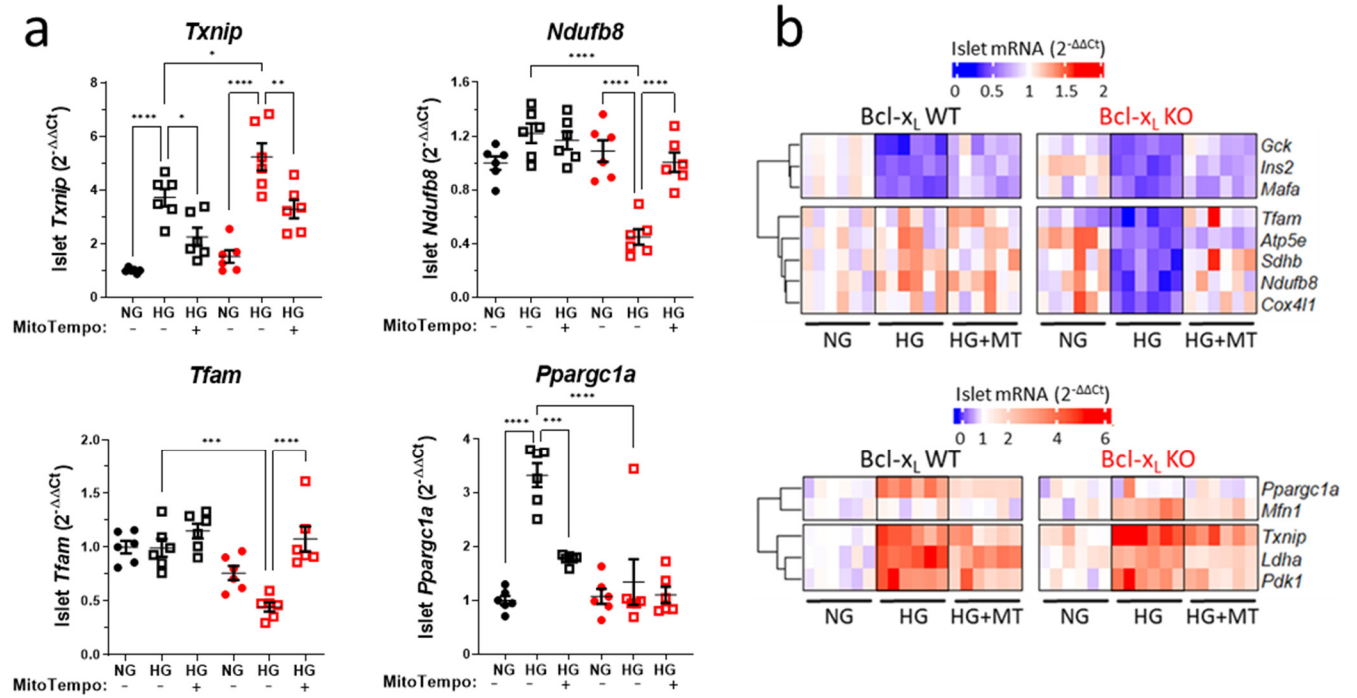



## Pasula et al. - Supplemental Figure 1.

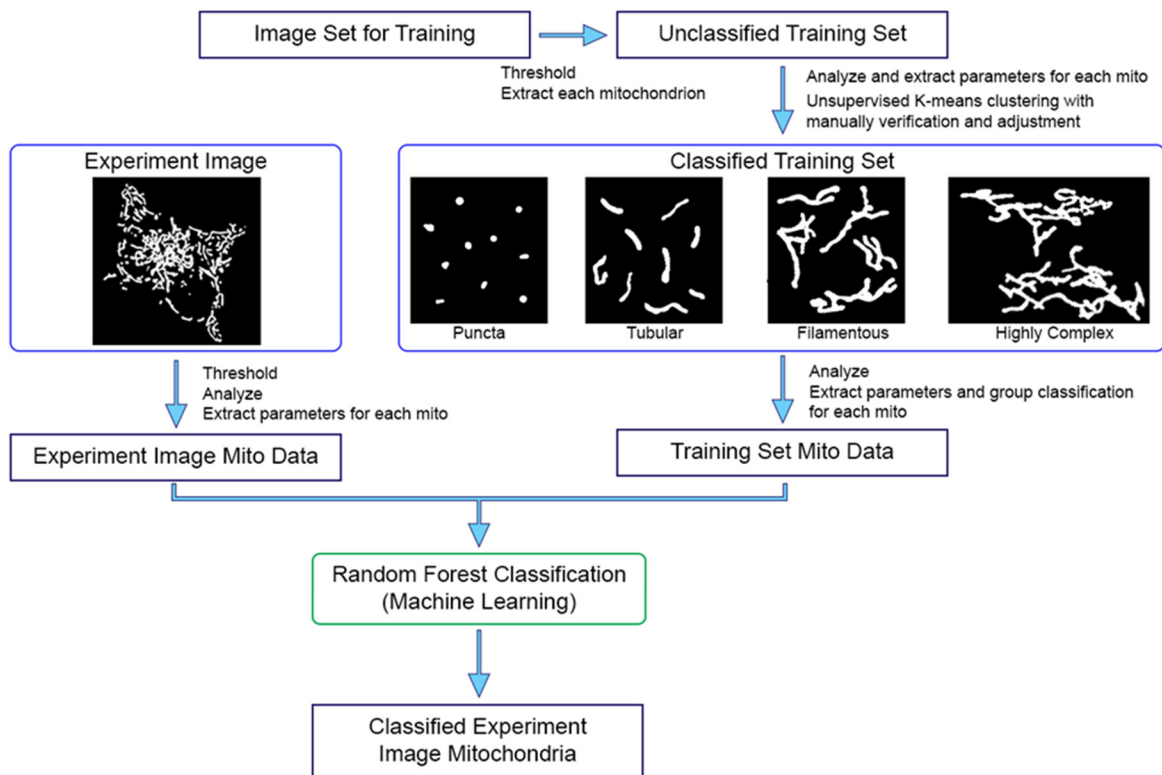

### Supplemental Figure 1. Schematic of workflow for machine learning-based classification of mitochondria.

Morphometric and network connectivity features are extracted from 3D reconstructions of  $\beta$ -cell mitochondria and the features grouped by unsupervised K-means clustering. The initially identified groups (7 in this case) are then concatenated and manually inspected, revealing 4 major mitochondrial classifications and training set is established. Representative images from each classification are shown here as maximum projections of their original 3D object. The training set is then used for Random Forest of mitochondria that have been analyzed in independent experiments, and each mitochondrion is assigned a morphometric classification. K-means clustering and Random Forest Classification were carried out using XLSTAT.

## Pasula et al. - Supplemental Figure 2.

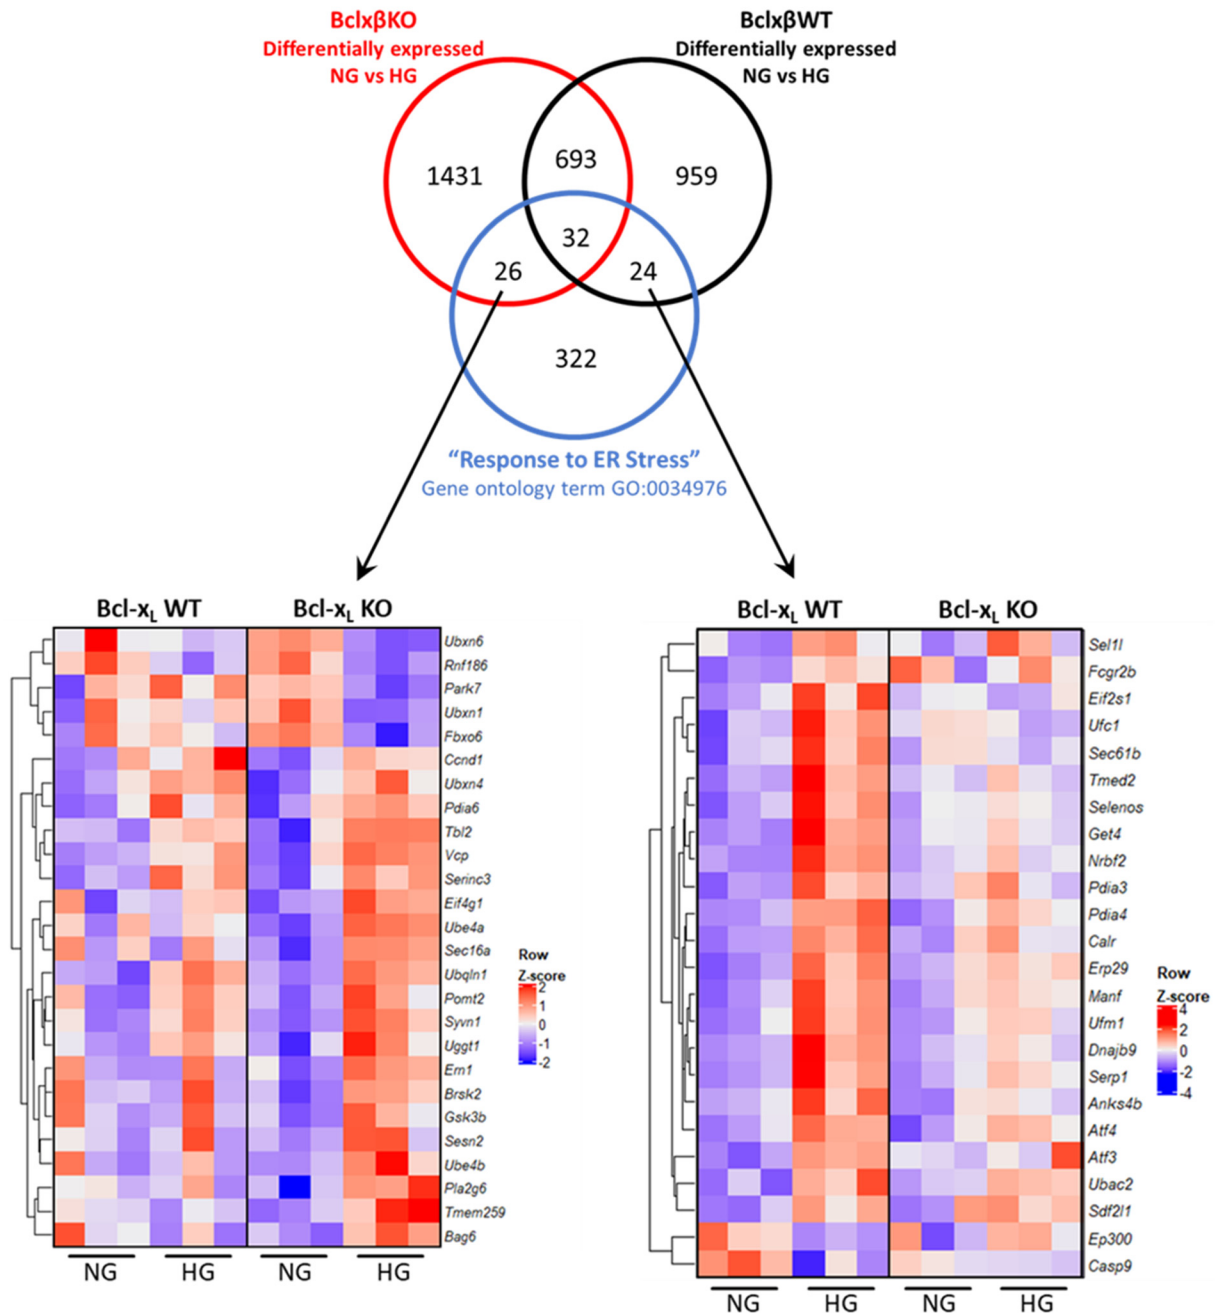

**Supplemental Figure 2** (related to Fig. 1). **Genotype-specific changes to ER-stress-related transcripts by high glucose stress.**

Venn diagram and heat map showing ER stress-related genes that changed significantly in only Bclx $\beta$ WT islets, or only in Bclx $\beta$ KO islets after 6 days HG culture. The 32 common transcripts that overlap with the Gene Ontology term “Cellular response to ER stress” (GO:003497) are shown in Fig. 1.

### Pasula et al. - Supplemental Figure 3.

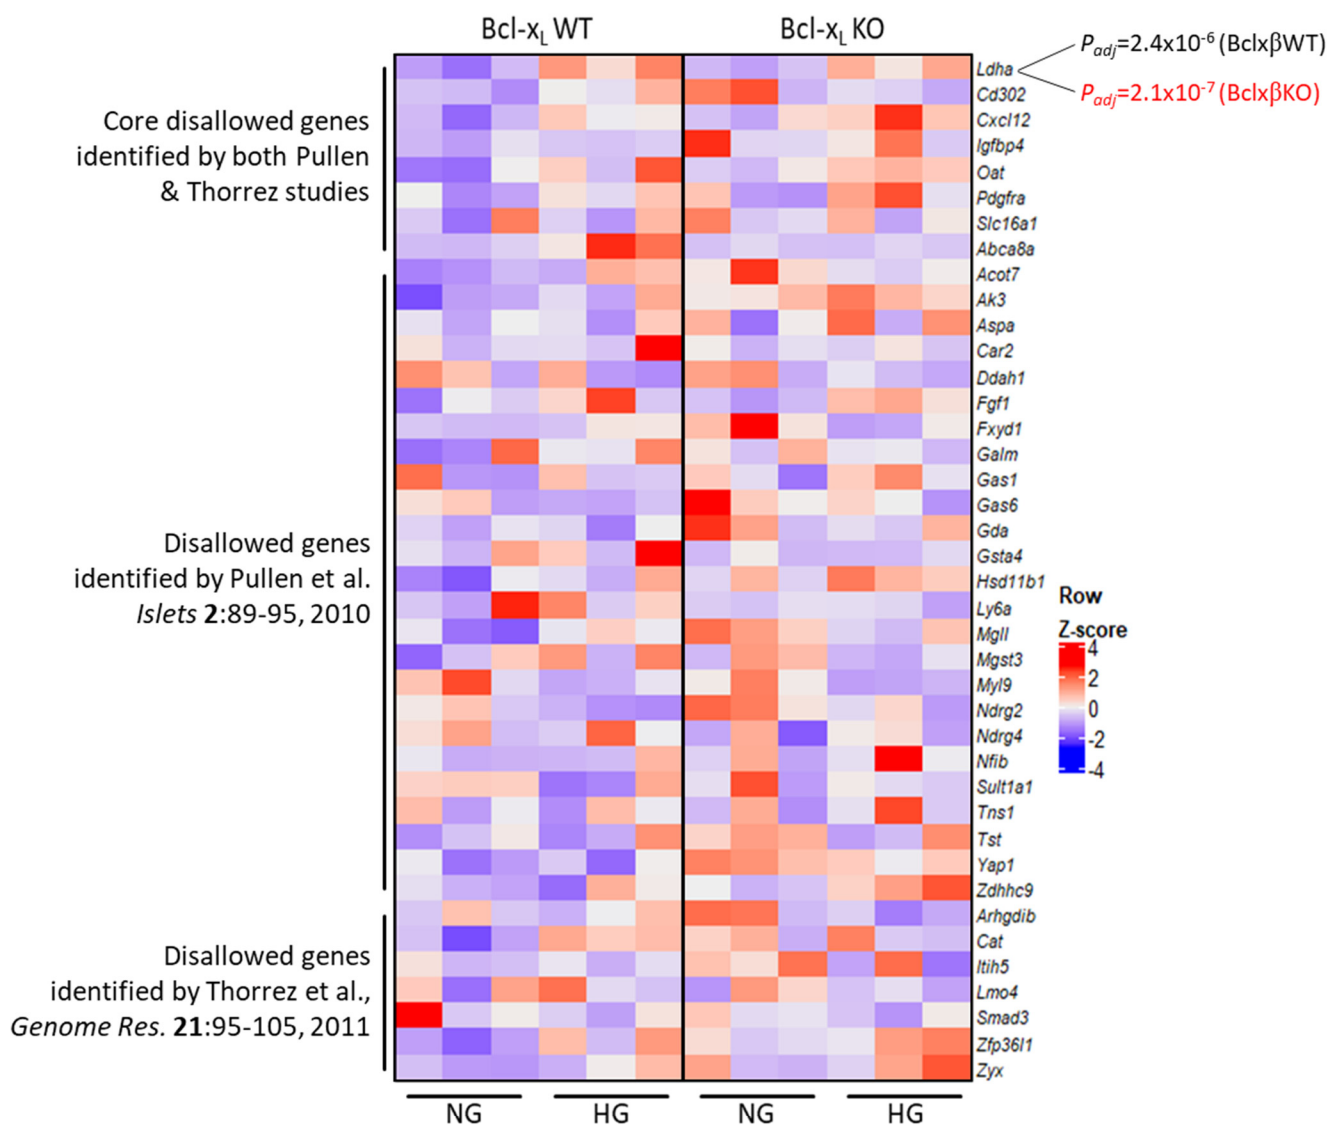

#### Supplemental Figure 3 (related to Fig. 2). Expression of $\beta$ -cell disallowed genes.

Heat map showing the levels of  $\beta$ -cell 'disallowed genes' in NG- and HG-cultured Bcl $\beta$ WT and Bcl $\beta$ KO islets. The list is combined from the  $\beta$ -cell disallowed genes identified in Pullen et al. *Islets* 2:89-95, 2010 and in Thorrez et al., *Genome Res.* 21:95-105, 2011. Of the "Core 7" shared between the two studies, only *Ldha* was significantly altered by HG culture in our RNA-Seq analysis.

## Pasula et al. - Supplemental Figure 4.

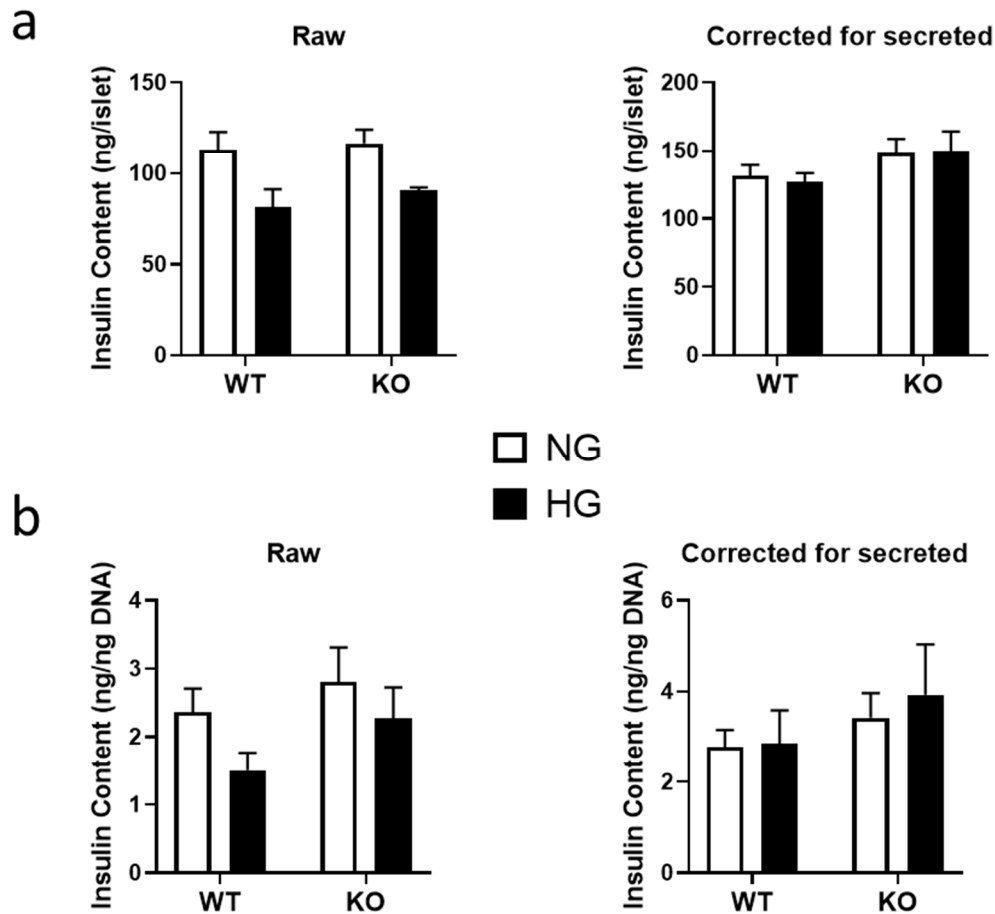

### Supplemental Figure 4 (related to Fig. 3). Insulin content in NG- and HG-cultured Bclx $\beta$ WT and Bclx $\beta$ KO islets.

Insulin content was extracted and quantified from islets following ramp glucose-stimulated insulin secretion assay (shown in Fig. 3). Extracted insulin content was expressed per islet (a) or per ng DNA (b) before and after correction for the total amount of insulin that was secreted during the glucose ramp. The tendency for HG-cultured islets to have lower insulin content is accounted for by their hyper-secretion of insulin.

## Pasula et al. - Supplemental Figure 5.

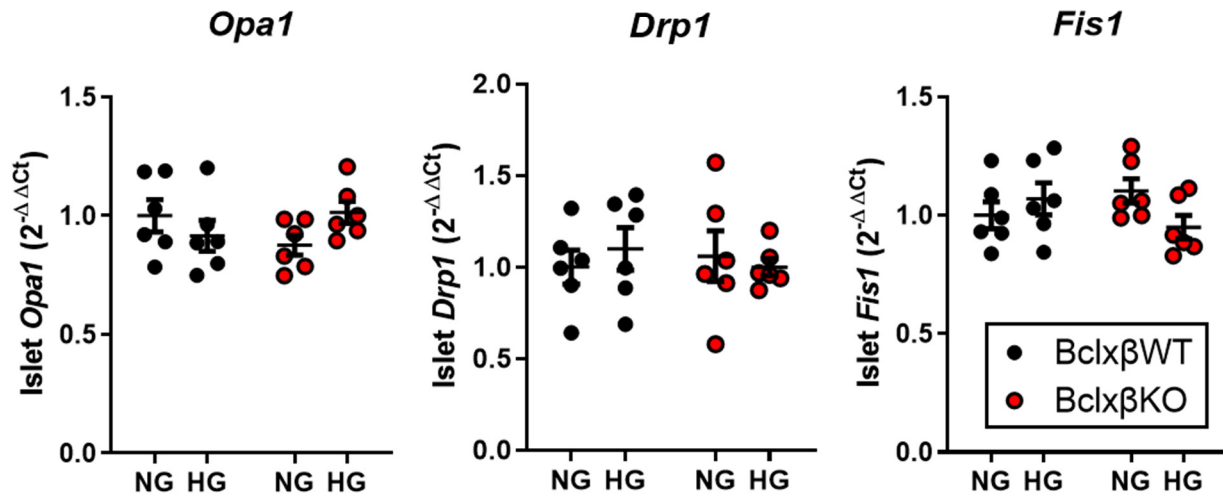

**Supplemental Figure 5** (related to Fig. 5). **Expression of mitochondrial fusion & fission regulators.** qPCR quantification of the expression of mitochondrial fusion (*Opa1*) and fission (*Drp1* & *Fis1*) regulators in Bclx $\beta$ WT and Bclx $\beta$ KO islets after 6 days culture in NG or HG. No significant differences by two-way ANOVA followed by multiple comparisons tests (n=6).

## Pasula et al. - Supplemental Figure 6.

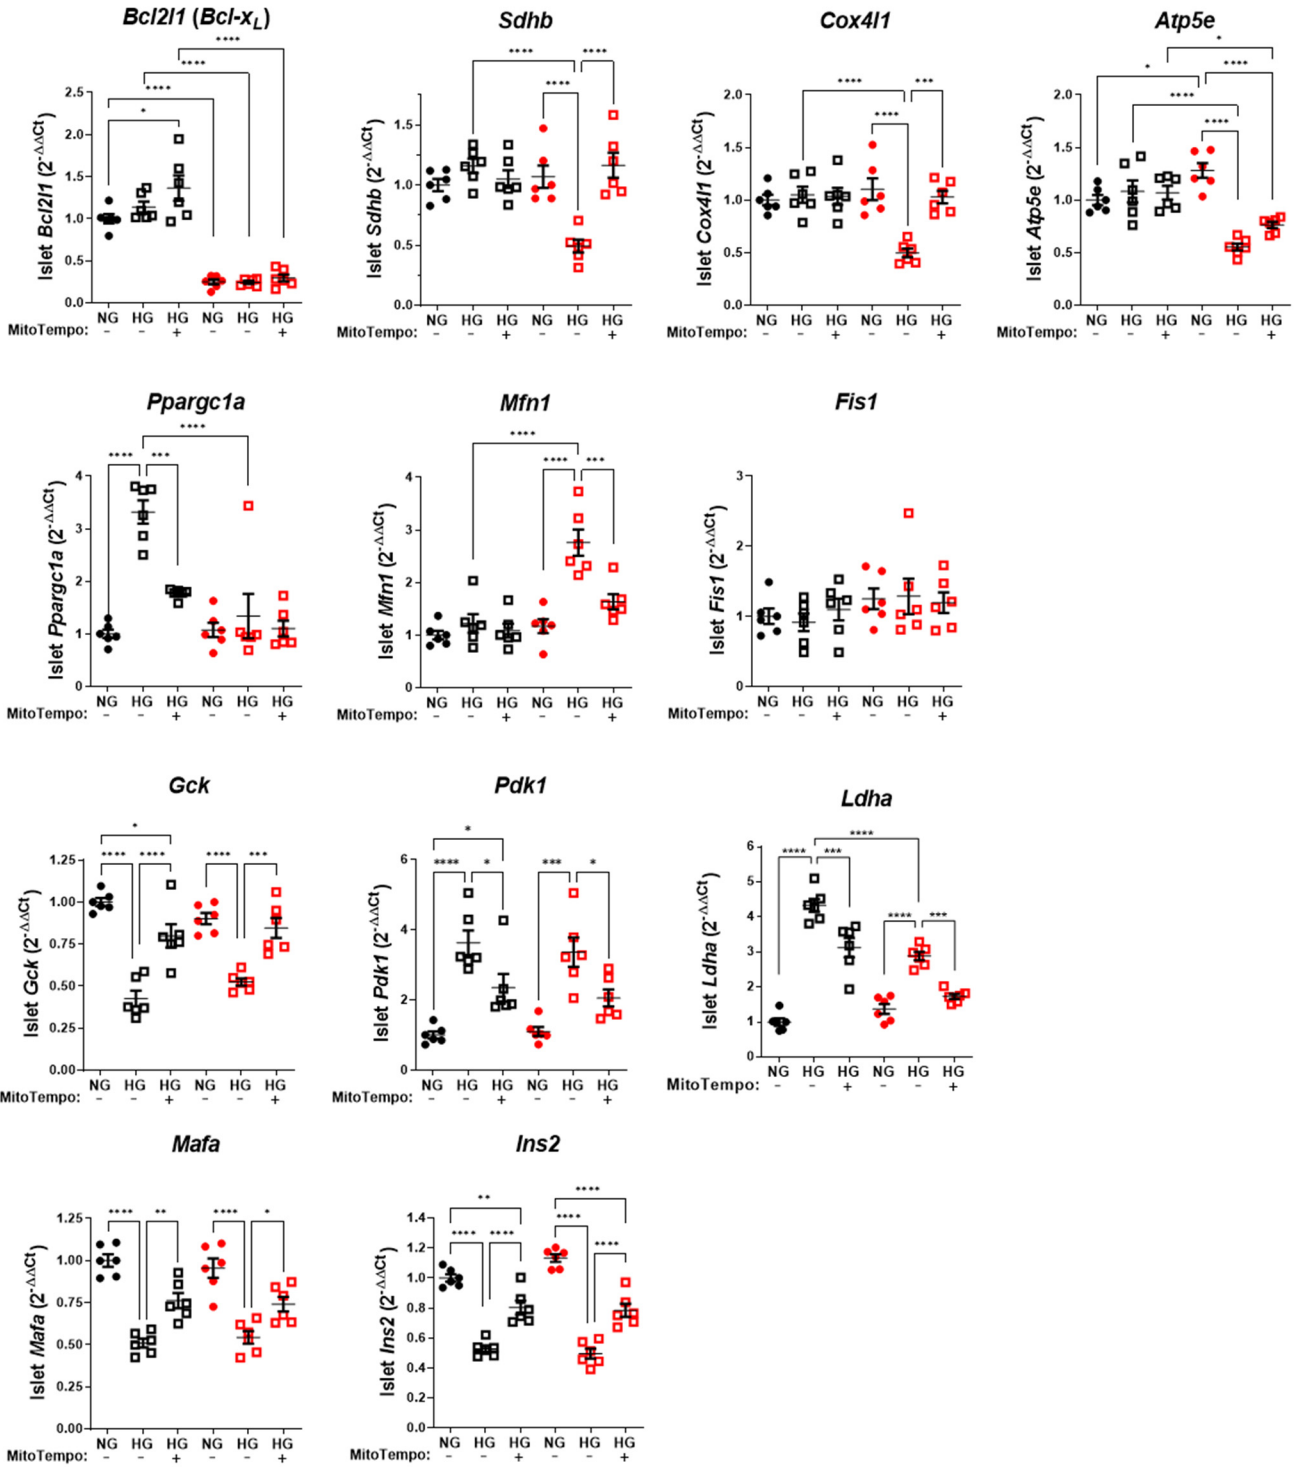

Supplemental Figure 6 (related to figure 7). qPCR analyses showing that mitoROS drives loss of ETC gene expression, metabolic reprogramming and loss of identity in HG-cultured  $\beta$ -cells. A heat map summary of these, and additional, qPCR experiments is shown in Fig. 7b.
